# Supplementary material for: Characterization of the Key Aroma Compounds of Shandong Matcha Using HS-SPME-GC/MS and SAFE-GC/MS
Source: MDPI journal article supplement (doi:10.3390/foods11192964), 2022-09-22
Supplement: s1 [file s1]

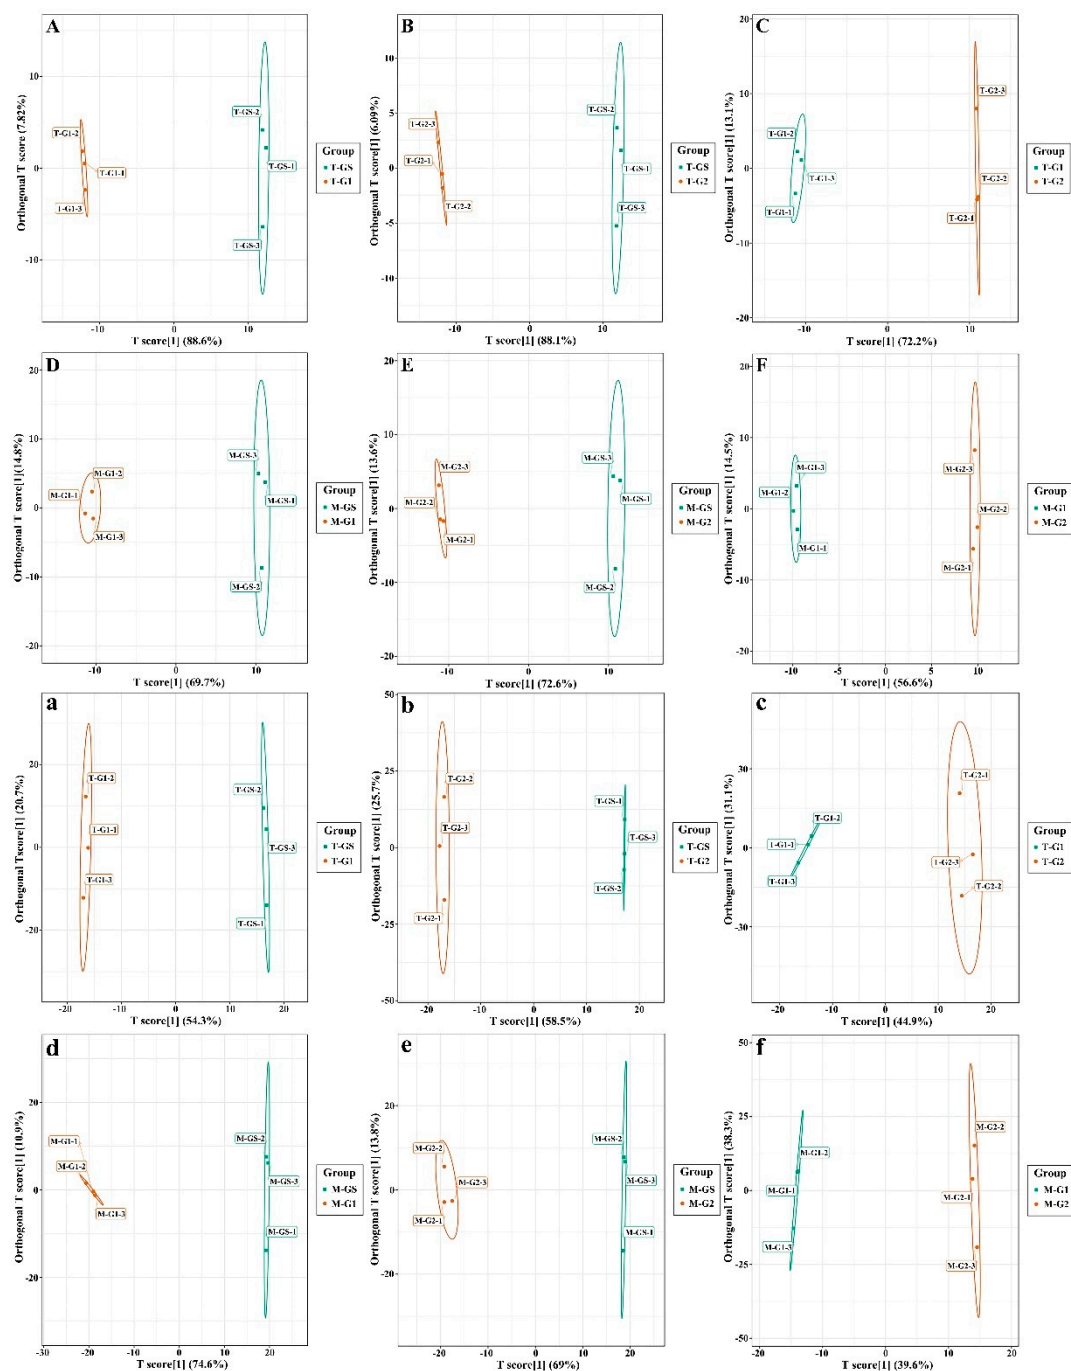

Figure S1. OPLS-DA analysis results of Shandong matcha and tencha. **(A-F)** HS-SPME. **(A)** T-GS and T-G1. **(B)** T-GS and T-G2. **(C)** T-G1 and T-G2. **(D)** M-GS and M-G1. **(E)** M-GS and M-G2. **(F)** M-G1 and M-G2. **(a-f)** SAFE. **(a)** T-GS and T-G1. **(b)** T-GS and T-G2. **(c)** T-G1 and T-G2. **(d)** M-GS and M-G1. **(e)** M-GS and M-G2. **(f)** M-G1 and M-G2.

Table S1. Comparison of volatile components extracted from Matcha and tencha by different methods.

| Class                 | HS-SPME (Peak Area) |       |       |       |       |       | SAFE (Concentration) |       |       |       |       |       |
|-----------------------|---------------------|-------|-------|-------|-------|-------|----------------------|-------|-------|-------|-------|-------|
|                       | M-GS                | M-G1  | M-G2  | T-GS  | T-G1  | T-G2  | M-GS                 | M-G1  | M-G2  | T-GS  | T-G1  | T-G2  |
| Alcohol               | 2.62                | 2.21  | 2.25  | 2.93  | 2.56  | 1.65  | 7.69                 | 4.97  | 4.57  | 5.64  | 4.22  | 3.68  |
| Aromatics             | 3.47                | 3.49  | 4.53  | 2.48  | 4.68  | 4.13  | 6.71                 | 6.59  | 6.68  | 6.43  | 7.20  | 6.57  |
| Aldehyde              | 1.10                | 0.67  | 0.90  | 1.25  | 1.49  | 1.14  | 4.02                 | 3.45  | 3.24  | 3.98  | 3.34  | 3.34  |
| Acid                  | 0.88                | 0.97  | 1.64  | 1.20  | 1.86  | 2.19  | 3.88                 | 4.11  | 4.38  | 3.74  | 5.12  | 5.42  |
| Terpenoids            | 16.92               | 7.44  | 11.76 | 18.52 | 11.47 | 10.11 | 25.09                | 10.76 | 12.82 | 22.05 | 14.34 | 14.63 |
| Hydrocarbons          | 11.65               | 8.86  | 12.80 | 8.30  | 14.03 | 13.92 | 11.13                | 18.78 | 16.17 | 12.45 | 16.10 | 13.66 |
| Ketone                | 4.57                | 1.90  | 2.47  | 4.89  | 2.84  | 2.10  | 10.25                | 6.48  | 6.97  | 8.40  | 6.79  | 6.60  |
| Heterocyclic compound | 49.53               | 65.35 | 45.84 | 51.90 | 46.54 | 44.01 | 12.12                | 17.02 | 17.07 | 17.65 | 17.83 | 17.56 |
| Ester                 | 6.91                | 7.34  | 15.27 | 6.78  | 12.23 | 18.25 | 12.96                | 24.73 | 24.99 | 15.88 | 21.82 | 25.34 |
| Others                | 2.34                | 1.76  | 2.55  | 1.76  | 2.32  | 2.49  | 6.16                 | 3.11  | 3.11  | 3.79  | 3.24  | 3.20  |

Table S2. Differential compounds of different grades of Shandong matcha.

| Compounds                                               | Class   | Odour quality               | Method | Type         |              |              |
|---------------------------------------------------------|---------|-----------------------------|--------|--------------|--------------|--------------|
|                                                         |         |                             |        | M-G1_vs_M-GS | M-G2_vs_M-GS | M-G2_vs_M-G1 |
| Octanal, 2-(phenylmethylene)-                           | Acid    | floral                      | SAFE   | up           | -            | -            |
| Butanoic Acid                                           | Acid    | cheesy                      | SAFE   | up           | up           | -            |
| Nonanoic Acid                                           | Acid    | waxy,dirty,cheesy,d<br>airy | SPME   | down         | -            | up           |
| 6-Octenoic Acid, 3,7-dimethyl-                          | Acid    | green、 grassy、<br>floral    | SAFE   | down         | down         |              |
| 8-Methyl-6-nonenoic Acid                                | Acid    | -                           | SAFE   | -            | up           | -            |
| 2-Propenoic Acid, 3-phenyl-                             | Acid    | balsamic                    | SAFE   | up           | -            | -            |
| 9,12,15-Octadecatrienoic Acid, (Z,Z,Z)-                 | Acid    | fatty                       | SAFE   | down         | down         |              |
| Gamolenic Acid                                          | Acid    | -                           | SAFE   | down         | down         |              |
| 2-Octenoic Acid                                         | Acid    | -                           | SAFE   | up           | up           | down         |
| Glycerin                                                | Alcohol | -                           | SAFE   | down         | down         |              |
| Cyclobutaneethanol, 1-methyl-2-(1-methylethenyl)-, cis- | Alcohol | -                           | SAFE   | up           | up           | down         |
| 2,4-Heptadien-1-ol, (E,E)-                              | Alcohol | fatty、 green、<br>fruity     | SAFE   | up           | up           | -            |
| 1-Hexanol, 3,5,5-trimethyl-                             | Alcohol | green                       | SAFE   | down         | down         |              |
| 2-Penten-1-ol, (Z)-                                     | Alcohol | green                       | SAFE   | up           | up           | -            |
| 3-Hexen-1-ol, (Z)-                                      | Alcohol | green                       | SAFE   | up           | up           | -            |
| 1-Octen-3-ol                                            | Alcohol | earthy                      | SAFE   | up           | -            | -            |
| Phenylethyl Alcohol                                     | Alcohol | floral                      | SAFE   | -            | down         |              |
| 1-Decanol                                               | Alcohol | fatty                       | SAFE   | down         | down         |              |
| 3,6-Nonadien-1-ol, (E,Z)-                               | Alcohol | green                       | SAFE   | up           | up           | -            |
| Batilol                                                 | Alcohol | -                           | SAFE   | down         | down         |              |

| Compounds                                                      | Class    | Odour quality            | Method  | Type         |              |              |
|----------------------------------------------------------------|----------|--------------------------|---------|--------------|--------------|--------------|
|                                                                |          |                          |         | M-G1_vs_M-GS | M-G2_vs_M-GS | M-G2_vs_M-G1 |
| 2-Nonen-1-ol                                                   | Alcohol  | fatty                    | SAFE    | down         | down         |              |
| 3,7-Octadiene-2,6-diol, 2,6-dimethyl-                          | Alcohol  | -                        | SAFE    | up           | up           | -            |
| 2-Decen-1-ol, (E)-                                             | Alcohol  | fatty                    | SAFE    | down         | down         |              |
| Cyclohexanol, 2,6-dimethyl-                                    | Alcohol  | -                        | SAFE    | up           | up           | -            |
| 4-Hexen-1-ol, acetate                                          | Alcohol  | -                        | SAFE    | up           | up           | -            |
| 2-Hexadecanol                                                  | Alcohol  | -                        | SAFE    | up           | up           | -            |
| Benzenemethanol, .alpha.-methyl-.alpha.-(1-methyl-2-propenyl)- | Alcohol  | -                        | HS-SPME | down         | down         | up           |
| Benzenemethanol, .alpha.-2-propenyl-                           | Alcohol  | -                        | SAFE    | up           | up           | -            |
| (2-Fluorophenyl) methanol, 2-methylpropyl ether                | Alcohol  | -                        |         | -            | up           | -            |
| Ethanol, 2-(4-ethylphenoxy)-                                   | Alcohol  | -                        | SAFE    | up           | up           | -            |
| (E)-2,6-Dimethylocta-5,7-dien-2-ol                             | Alcohol  | -                        | SAFE    | up           | -            | -            |
| 3-Cyclohexene-1-carboxAldehyde, 4-(4-methyl-3-pentenyl)-       | Aldehyde | citrus、floral、<br>marine | SAFE    | down         | down         |              |
| Hexanal                                                        | Aldehyde | green                    | SAFE    | up           | up           | -            |
| 2-Hexenal                                                      | Aldehyde | green                    | SAFE    | -            | down         |              |
| Heptanal                                                       | Aldehyde | green                    | HS-SPME | down         | -            |              |
| 2,4-Hexadienal, (E,E)-                                         | Aldehyde | green                    | SAFE    | up           | up           | -            |
| BenzeneacetAldehyde                                            | Aldehyde | green                    | HS-SPME | up           | up           | -            |
| 2,4-Octadienal, (E,E)-                                         | Aldehyde | green                    | SAFE    | up           | up           | -            |
| 2-Nonenal                                                      | Aldehyde | fatty、green              | SAFE    | -            | up           | -            |
| BenzAldehyde, 4-ethyl-                                         | Aldehyde | fruity                   | SAFE    | up           | up           | -            |
| 1-Cyclohexene-1-carboxAldehyde, 4-(1-methylethenyl)-           | Aldehyde | herbal                   | SAFE    | up           | up           | down         |
| 4-Isopropylcyclohexa-1,3-dienecarbAldehyde                     | Aldehyde | fatty、spicy              | SAFE    | up           | up           | -            |

| Compounds                                               | Class     | Odour quality              | Method | Type         |              |              |
|---------------------------------------------------------|-----------|----------------------------|--------|--------------|--------------|--------------|
|                                                         |           |                            |        | M-G1_vs_M-GS | M-G2_vs_M-GS | M-G2_vs_M-G1 |
| Undecanal                                               | Aldehyde  | waxy、floral、<br>green      | SAFE   | down         | down         |              |
| Hexadecanal                                             | Aldehyde  | cardboard                  | SAFE   | down         | down         |              |
| 2-FurAldehyde diethyl acetal                            | Aldehyde  | fruity、earthy、<br>mushroom | SAFE   | -            | up           | -            |
| BenzAldehyde, 2-methyl-                                 | Aldehyde  | cherry                     | SAFE   | up           | up           | -            |
| BenzAldehyde, 3-methyl-                                 | Aldehyde  | fruity                     | SAFE   | up           | up           | -            |
| 4-MethoxycinnamAldehyde                                 | Aldehyde  | spicy、cinnamon、<br>sweet   | SAFE   | down         | down         |              |
| trans-4-MethoxycinnamAldehyde                           | Aldehyde  | spicy、floral、<br>sweet     | SAFE   | down         | down         |              |
| CinnamAldehyde, .alpha.-pentyl-                         | Aldehyde  | floral                     | SAFE   | up           | up           | -            |
| BenzAldehyde, 3-ethyl-                                  | Aldehyde  | -                          | SAFE   | up           | -            | -            |
| BenzAldehyde, 2,4-dimethyl-                             | Aldehyde  | naphthyl、cherry            | SAFE   | up           | up           | -            |
| 2,5-FurandicarboxAldehyde                               | Aldehyde  | -                          | SAFE   | up           | up           | -            |
| AcetAldehyde, (3,3-dimethylcyclohexylidene)-, (Z)-      | Aldehyde  | -                          | SAFE   | up           | up           | -            |
| BenzAldehyde, 2,4-dihydroxy-3,6-dimethyl-               | Aldehyde  | -                          | SAFE   | up           | up           | -            |
| BenzeneacetAldehyde, .alpha.-methyl-4-(2-methylpropyl)- | Aldehyde  | -                          | SAFE   | -            | down         | down         |
| Benzamide                                               | Amine     | -                          | SAFE   | down         | down         |              |
| CyclohexanAmine, N-cyclohexyl-                          | Amine     | -                          | SAFE   | up           | up           | -            |
| BenzenAmine, 2-methoxy-5-nitro-                         | Amine     | -                          | SAFE   | down         | down         |              |
| Benzene, 1,1'-[oxybis(methylene)]bis-                   | Aromatics | earthy                     | SAFE   | up           | up           | -            |
| Benzene, 1,2,4,5-tetramethyl-                           | Aromatics | -                          | SAFE   | down         | down         |              |
| Benzene, (2-nitroethyl)-                                | Aromatics | flower、spice               | SAFE   | up           | down         | down         |

| Compounds                                       | Class     | Odour quality              | Method  | Type         |              |              |
|-------------------------------------------------|-----------|----------------------------|---------|--------------|--------------|--------------|
|                                                 |           |                            |         | M-G1_vs_M-GS | M-G2_vs_M-GS | M-G2_vs_M-G1 |
| Estragole                                       | Aromatics | anisic                     | SAFE    | down         | down         |              |
| Naphthalene                                     | Aromatics | pungent                    | HS-SPME | down         | down         |              |
| 1,2,3-trimethoxy-5-(2-propenyl)-Benzene         | Aromatics | spicy、floral               | SAFE    | up           | -            | -            |
| Benzene, 1,2,3-trimethoxy-5-(1-propenyl)-, (E)- | Aromatics | spicy、floral               | SAFE    | up           | up           | -            |
| Naphthalene, 1,2,3,4-tetrahydro-                | Aromatics | -                          | SAFE    | down         | down         |              |
| Isoelemicin                                     | Aromatics | -                          | SAFE    | -            | up           | -            |
| p-Hydroxybiphenyl                               | Aromatics | -                          | SAFE    | down         | down         |              |
| Benzene, 1-ethyl-3-methyl-                      | Aromatics | -                          | SAFE    | down         | -            |              |
| Benzene, 1-ethyl-2-methyl-                      | Aromatics | -                          | HS-SPME | down         | down         |              |
| TRANS-ANETHOLE                                  | Aromatics | licorice 甘草                | SAFE    | down         | down         |              |
| Benzene, 1,4-dichloro-                          | Aromatics | -                          | SAFE    | up           | up           | -            |
| Anisole                                         | Aromatics | phenolic                   | SAFE    | -            | down         |              |
| Asarone                                         | Aromatics | -                          | SAFE    | down         | down         |              |
| Mesitylene                                      | Aromatics | -                          | HS-SPME | down         | down         |              |
| p-Xylene                                        | Aromatics | plastic, green,<br>pungent | SAFE    | up           | up           | -            |
| Hydrazine, (4-methoxyphenyl)-                   | Aromatics | -                          | SAFE    | down         | down         |              |
| 3,4-Dimethoxytoluene                            | Aromatics | -                          | SAFE    | up           | up           | -            |
| .alpha.-Methylstyrene                           | Aromatics | -                          | SAFE    | down         | -            |              |
| Benzene, 1-propynyl-                            | Aromatics | -                          | HS-SPME | -            | down         |              |
| Benzene, pentamethyl-                           | Aromatics | -                          | HS-SPME | -            | down         |              |
| Benzene, 1,2-diethyl-3,4-dimethyl-              | Aromatics | -                          | SAFE    | down         | down         |              |
| 1-(3-Methylbutyl)-2,3,5,6-tetramethylbenzene    | Aromatics | -                          |         | -            | -            | down         |
| (5-bromopentyl)-Benzene,                        | Aromatics | -                          | SAFE    | up           | up           | -            |

| Compounds                                                           | Class     | Odour quality            | Method  | Type         |              |              |
|---------------------------------------------------------------------|-----------|--------------------------|---------|--------------|--------------|--------------|
|                                                                     |           |                          |         | M-G1_vs_M-GS | M-G2_vs_M-GS | M-G2_vs_M-G1 |
| (3-Bromo-1-methylpropoxymethyl)benzene                              | Aromatics | -                        | SAFE    | up           | up           | -            |
| Benzene, 1,2-diethyl-3,4,5,6-tetramethyl-                           | Aromatics | -                        | SAFE    | up           | up           | -            |
| Benzene, 2-ethyl-1,4-dimethyl-                                      | Aromatics | -                        | SAFE    | up           | up           | -            |
| Naphthalene, 1,2,3,4,4a,5,6,7-octahydro-4a-methyl-                  | Aromatics | -                        | SAFE    | up           | up           | -            |
| Naphthalene, 1,2-dihydro-4,5,7-trimethyl-                           | Aromatics | -                        | HS-SPME | -            | down         |              |
| Propanoic acid, hexyl ester                                         | Ester     | fruity                   | SAFE    | down         | -            |              |
| n-Capric acid isobutyl ester                                        | Ester     | fermented、oily、<br>sweet | SAFE    | down         | down         |              |
| 3-Hexen-1-ol, formate, (Z)-                                         | Ester     | green                    | HS-SPME | down         | down         |              |
| 1,3-Cyclohexadiene-1-carboxylic acid, 2,6,6-trimethyl-, ethyl ester | Ester     | floral                   | SAFE    | up           | up           | -            |
| 2-Furancarboxylic acid, hexyl ester                                 | Ester     | floral                   | HS-SPME | down         | down         |              |
| 3-Hexen-1-ol, acetate, (Z)-                                         | Ester     | green                    | SAFE    | down         | down         | down         |
| Butanoic acid, 3-hexenyl ester, (Z)-                                | Ester     | green                    | HS-SPME | down         | down         | down         |
| cis-3-Hexenyl-.alpha.-methylbutyrate                                | Ester     | green                    | HS-SPME | down         | down         | down         |
| Methyl salicylate                                                   | Ester     | minty                    | HS-SPME | down         | down         |              |
| Isobornyl formate                                                   | Ester     | balsamic                 | SAFE    | up           | up           | -            |
| Bicyclo[2.2.1]heptan-2-ol, 1,7,7-trimethyl-, formate, endo-         | Ester     | green、earthy、<br>herbal  | SAFE    | up           | up           | -            |
| trans-Geranic acid methyl ester                                     | Ester     | waxy                     | SAFE    | down         | down         |              |
| Acetic acid, nonyl ester                                            | Ester     | waxy                     | SAFE    | down         | down         |              |
| Hexanoic acid, 3-hexenyl ester, (Z)-                                | Ester     | green                    | HS-SPME | down         | down         | down         |
| Hexanoic acid, hexyl ester                                          | Ester     | green                    | HS-SPME | down         | down         | down         |
| Butanoic acid, 3-methyl-, 1-ethenyl-1,5-dimethyl-4-hexenyl ester    | Ester     | herbal、cirtus            | SAFE    | up           | -            | down         |
| Dodecanoic acid, methyl ester                                       | Ester     | waxy                     |         | -            | -            | down         |

| Compounds                                                        | Class | Odour quality          | Method  | Type         |              |              |
|------------------------------------------------------------------|-------|------------------------|---------|--------------|--------------|--------------|
|                                                                  |       |                        |         | M-G1_vs_M-GS | M-G2_vs_M-GS | M-G2_vs_M-G1 |
| Butanoic acid, 3,7-dimethyl-2,6-octadienyl ester, (E)-           | Ester | fruity                 | HS-SPME | down         | down         |              |
| Benzoic acid, 1-methylethyl ester                                | Ester | floral                 | SAFE    | up           | up           | -            |
| .delta.-Dodecalactone                                            | Ester | tropical               | SAFE    | down         | -            |              |
| Hexanedioic acid, dimethyl ester                                 | Ester | nutty                  | SAFE    | up           | up           | -            |
| Fenobucarb                                                       | Ester | -                      | HS-SPME | up           | up           | -            |
| (S)-4-(1-Acetoxyallyl)phenyl acetate                             | Ester | -                      | SAFE    | up           | up           | -            |
| 4-Pentenyl Acetate                                               | Ester | green                  | SAFE    | up           | up           | -            |
| n-Caproic acid vinyl ester                                       | Ester | -                      | SAFE    | down         | down         |              |
| 2(4H)-Benzofuranone, 5,6,7,7a-tetrahydro-4,4,7a-trimethyl-, (R)- | Ester | musk                   | HS-SPME | up           | up           | -            |
| E-2-Hexenyl benzoate                                             | Ester | -                      | SAFE    | down         | down         | down         |
| Methylparaben                                                    | Ester | -                      | SAFE    | up           | up           | -            |
| 4-Decenoic acid, methyl ester, Z-                                | Ester | fruity、fishy、<br>green | SAFE    | down         | down         |              |
| 9,12,15-Octadecatrienoic acid, methyl ester                      | Ester | oily、fatty、fruity      | SAFE    | down         | down         |              |
| Benzoic acid, 4-ethoxy-, ethyl ester                             | Ester | -                      | SAFE    | up           | up           | -            |
| Isopropyl myristate                                              | Ester | fatty                  | SAFE    | -            | down         | down         |
| n-Propyl acetate                                                 | Ester | fruity                 | SAFE    | -            | up           | up           |
| Hexadecanoic acid, methyl ester                                  | Ester | waxy                   | HS-SPME | down         | down         |              |
| 1,2-Benzenedicarboxylic acid, bis(2-methylpropyl) ester          | Ester | -                      | HS-SPME | down         | -            |              |
| cis-3-Hexenyl cis-3-hexenoate                                    | Ester | green                  | HS-SPME | down         | down         | down         |
| 3-Hexen-1-ol benzoate                                            | Ester | -                      | HS-SPME | down         | down         |              |
| Dehydromevalonic lactone                                         | Ester | -                      | SAFE    | up           | up           | -            |
| 9,12,15-Octadecatrienoic acid, methyl ester, (Z,Z,Z)-            | Ester | -                      | HS-SPME | down         | down         |              |
| Sulfurous acid, isobutyl pentyl ester                            | Ester | -                      | HS-SPME | down         | down         |              |

| Compounds                                                           | Class | Odour quality | Method  | Type         |              |              |
|---------------------------------------------------------------------|-------|---------------|---------|--------------|--------------|--------------|
|                                                                     |       |               |         | M-G1_vs_M-GS | M-G2_vs_M-GS | M-G2_vs_M-G1 |
| Benzoic acid, 2-propenyl ester                                      | Ester | fruity        | SAFE    | up           | -            | -            |
| l-Alanine, N-(2,3,4-trifluorobenzoyl)-, methyl ester                | Ester | -             | HS-SPME | down         | down         | down         |
| (1R,5S,6R)-2,7,7-Trimethylbicyclo[3.1.1]hept-2-en-6-yl acetate      | Ester | -             | SAFE    | up           | up           | -            |
| 4-Methylhexyl 3-methylbutanoate                                     | Ester | -             | SAFE    | down         | down         |              |
| 2-Butenoic acid, 2-methyl-, 2-methylpropyl ester                    | Ester | -             | SAFE    | up           | up           | -            |
| Butanoic acid, cyclopentyl ester                                    | Ester | -             | SAFE    | down         | down         |              |
| 2-Butenoic acid, 3-hexenyl ester, (E,Z)-                            | Ester | green         | HS-SPME | down         | down         |              |
| Hexanoic acid, 3-hexenyl ester                                      | Ester | -             | SAFE    | -            | down         | down         |
| Ethyl mandelate                                                     | Ester | -             | SAFE    | up           | up           | -            |
| Butanoic acid, 2-methyl-, 3,7-dimethyl-2,6-octadienyl ester, (E)-   | Ester | fruity        | SAFE    | up           | -            | -            |
| Propanoic acid, 2-methyl-, butyl ester                              | Ester | fruity        | SAFE    | up           | up           | -            |
| Propanoic acid, 2-methyl-, 2-methylbutyl ester                      | Ester | fruity        | SAFE    | down         | -            |              |
| Phosphinic acid, diethyl-, methyl ester                             | Ester | -             | HS-SPME | down         | down         |              |
| Benzoic acid, 3,4-dimethyl-, methyl ester                           | Ester | -             | SAFE    | -            | up           | -            |
| Ethyl tridecanoate                                                  | Ester | -             | SAFE    | up           | -            | -            |
| Octanoic acid, 3-hexenyl ester, (Z)-                                | Ester | green         | HS-SPME | down         | down         |              |
| Pentadecanoic acid, 14-methyl-, methyl ester                        | Ester | -             | SAFE    | down         | down         | down         |
| (6,6-dimethyl-2-bicyclo[3.1.1]hept-2-enyl)methyl 2-methylpropanoate | Ester | woody、fruity  | SAFE    | up           | up           | -            |
| Geranyl isobutyrate                                                 | Ester | floral        | SAFE    | -            | down         | down         |
| Sulfurous acid, hexyl pentadecyl ester                              | Ester | -             | HS-SPME | down         | -            | up           |
| Sulfurous acid, 2-ethylhexyl hexyl ester                            | Ester | -             | HS-SPME | down         | -            | up           |
| 2-(2-butoxyethoxy)-Ethanol,acetate                                  | Ester | -             | HS-SPME | down         | down         | down         |
| (Z,Z)-9,15-Octadecadienoic acid, methyl ester                       | Ester | -             | HS-SPME | down         | down         |              |

| Compounds                                           | Class                       | Odour quality               | Method | Type         |              |              |
|-----------------------------------------------------|-----------------------------|-----------------------------|--------|--------------|--------------|--------------|
|                                                     |                             |                             |        | M-G1_vs_M-GS | M-G2_vs_M-GS | M-G2_vs_M-G1 |
| (E)-Hexanoic acid, 2-hexenyl ester                  | Ester                       | green                       |        | -            | -            |              |
| Benzene, 1-methoxy-2-methyl-                        | Ether                       | sweet、 nutty、<br>floral     | SAFE   | down         | down         | down         |
| Cyclopropanecarboxylic acid chloride                | Halogenated<br>hydrocarbons | -                           | SAFE   | -            | up           | -            |
| 1-iodo-Decane                                       | Halogenated<br>hydrocarbons | -                           | SAFE   | up           | up           | -            |
| 2-Acetyl-3-methylpyrazine                           | Heterocyclic<br>compound    | nutty                       | SAFE   | down         | down         | down         |
| 2H-Pyran-2-one, tetrahydro-6-nonyl-                 | Heterocyclic<br>compound    | waxy                        | SAFE   | down         | down         |              |
| Pyrazine, (2-methylpropyl)-                         | Heterocyclic<br>compound    | green、 vegetable、<br>fruity | SAFE   | up           | up           | -            |
| 5,6,7,8-Tetrahydroquinoxaline                       | Heterocyclic<br>compound    | nutty                       | SAFE   | down         | down         |              |
| Sesquirosefuran                                     | Heterocyclic<br>compound    | -                           | SAFE   | down         | down         |              |
| 2H-Pyran-3-ol, 6-ethenyltetrahydro-2,2,6-trimethyl- | Heterocyclic<br>compound    | floral                      | SAFE   | up           | -            | down         |
| Ethanone, 1-(2-furanyl)-                            | Heterocyclic<br>compound    | balsamic                    | SAFE   | down         | down         |              |
| Furan, 2-pentyl-                                    | Heterocyclic<br>compound    | fruity、 green、<br>earthy    | SAFE   | up           | up           | -            |

| Compounds                                    | Class                 | Odour quality     | Method  | Type         |              |              |
|----------------------------------------------|-----------------------|-------------------|---------|--------------|--------------|--------------|
|                                              |                       |                   |         | M-G1_vs_M-GS | M-G2_vs_M-GS | M-G2_vs_M-G1 |
| Ethanone, 1-(1H-pyrrol-2-yl)-                | Heterocyclic compound | musty             | SAFE    | -            | down         | down         |
| Pyrazine, 2-ethyl-3-methyl-                  | Heterocyclic compound | nut               | SAFE    | down         | down         |              |
| Pyrazine, 3-ethyl-2,5-dimethyl-              | Heterocyclic compound | nutty             | SAFE    | down         | down         |              |
| Pyrazine, 2-ethyl-3,5-dimethyl-              | Heterocyclic compound | nutty             | HS-SPME | down         | down         |              |
| 2,3-Dimethyl-5-ethylpyrazine                 | Heterocyclic compound | roasted           | SAFE    | down         | down         |              |
| rose furan epoxide                           | Heterocyclic compound | green             | SAFE    | up           | up           | down         |
| Ethanethioic acid, S-(2-furanylmethyl) ester | Heterocyclic compound | sulfurous、roasted | SAFE    | up           | up           | -            |
| Indole                                       | Heterocyclic compound | animal            | HS-SPME | down         | down         |              |
| Coumarin                                     | Heterocyclic compound | tonka             | HS-SPME | down         | down         |              |
| 2H-Pyran-2-one, 5,6-dihydro-6-pentyl-        | Heterocyclic compound | coconut、sweet     | SAFE    | up           | up           | -            |
| Hydrocoumarin                                | Heterocyclic compound | tonka             | SAFE    | up           | up           | -            |
| Precocene I                                  | Heterocyclic compound | -                 | HS-SPME | up           | -            | -            |

| Compounds                                                 | Class                 | Odour quality | Method  | Type         |              |              |
|-----------------------------------------------------------|-----------------------|---------------|---------|--------------|--------------|--------------|
|                                                           |                       |               |         | M-G1_vs_M-GS | M-G2_vs_M-GS | M-G2_vs_M-G1 |
| 2H-Indol-2-one, 1,3-dihydro-                              | Heterocyclic compound | -             | SAFE    | up           | up           | -            |
| 5,6-Dihydro-5-methyluracil                                | Heterocyclic compound | -             | SAFE    | up           | up           | -            |
| Pentylentetrazol                                          | Heterocyclic compound | -             | SAFE    | down         | down         |              |
| GrAmine                                                   | Heterocyclic compound | -             | SAFE    | up           | up           | -            |
| Debrisoquine                                              | Heterocyclic compound | -             | SAFE    | up           | up           | -            |
| Pentobarbital                                             | Heterocyclic compound | -             | SAFE    | down         | -            |              |
| 2-methyl-4-Quinolinol                                     | Heterocyclic compound | -             | SAFE    | up           | up           | up           |
| [1,3]Dioxolo[4,5-j]phenanthridine                         | Heterocyclic compound | -             | SAFE    | down         | down         |              |
| Nifedipine                                                | Heterocyclic compound | -             | SAFE    | down         | down         |              |
| 2(5H)-Furanone                                            | Heterocyclic compound | buttery       | SAFE    | -            | down         |              |
| Caffeine                                                  | Heterocyclic compound | -             | HS-SPME | down         | -            | up           |
| 7,9-Di-tert-butyl-1-oxaspiro(4,5)deca-6,9-diene-2,8-dione | Heterocyclic compound | -             | HS-SPME | down         | -            |              |

| Compounds                           | Class                 | Odour quality    | Method | Type         |              |              |
|-------------------------------------|-----------------------|------------------|--------|--------------|--------------|--------------|
|                                     |                       |                  |        | M-G1_vs_M-GS | M-G2_vs_M-GS | M-G2_vs_M-G1 |
| 1H-Pyrrole-3-carbonitrile           | Heterocyclic compound | -                | SAFE   | up           | up           | -            |
| 2,2'-Ethylidenebis(5-methylfuran)   | Heterocyclic compound | -                | SAFE   | up           | -            | -            |
| 1H-Pyrazolo[3,4-d]pyrimidin-4-amine | Heterocyclic compound | -                | SAFE   | up           | -            | -            |
| 1,4 Benzodioxan-6-amine             | Heterocyclic compound | -                | SAFE   | up           | up           | -            |
| 2-Ethylpiperidine                   | Heterocyclic compound | -                | SAFE   | down         | -            | -            |
| Piperidin-3-one, 2,2,5-methyl-      | Heterocyclic compound | -                | SAFE   | up           | up           | -            |
| 1-Pentanone, 1-(2-furanyl)-         | Heterocyclic compound | sweet、caramellic | SAFE   | up           | up           | -            |
| 6-Quinolinamine, 2-methyl-          | Heterocyclic compound | -                | SAFE   | up           | -            | down         |
| 2-Piperidinimine                    | Heterocyclic compound | -                | SAFE   | up           | -            | -            |
| Furan, 2-(1-pentenyl)-, (E)-        | Heterocyclic compound | roasted          | SAFE   | up           | up           | -            |
| 1,2,4,5-Tetrazin-3-Amine            | Heterocyclic compound | -                | SAFE   | down         | -            | -            |
| 1,2,4,5-Tetrazine-3,6-diAmine       | Heterocyclic compound | -                | SAFE   | up           | up           | -            |

| Compounds                                                           | Class                 | Odour quality | Method  | Type         |              |              |
|---------------------------------------------------------------------|-----------------------|---------------|---------|--------------|--------------|--------------|
|                                                                     |                       |               |         | M-G1_vs_M-GS | M-G2_vs_M-GS | M-G2_vs_M-G1 |
| (E)-linalool oxide (pyranoid)                                       | Heterocyclic compound | woody         | HS-SPME | down         | down         | down         |
| 3-Methyl-4,5-diamino-1,2,4(4H)-triazole                             | Heterocyclic compound | -             | SAFE    | down         | -            |              |
| 4H-Pyran-4-one, 2,3-dihydro-3,5-dihydroxy-6-methyl-                 | Heterocyclic compound | -             | SAFE    | -            | down         |              |
| 1H-Pyrazole-1-carboximidamide, 3,5-dimethyl-                        | Heterocyclic compound | -             | SAFE    | up           | up           | -            |
| 3-Methylbenzothiophene                                              | Heterocyclic compound | -             | SAFE    | down         | down         |              |
| (5R,8aR)-5-Propyloctahydroindolizine                                | Heterocyclic compound | -             | HS-SPME | down         | -            |              |
| 1H-Imidazole, 2-propyl-                                             | Heterocyclic compound | -             | SAFE    | up           | up           | -            |
| 3,5-Dimethyl-1-butylpyrazole                                        | Heterocyclic compound | -             | SAFE    | up           | up           | -            |
| 1,7-Diazabicyclo[2.2.0]heptane                                      | Heterocyclic compound | -             | SAFE    | up           | up           | -            |
| 2-Thiophenecarboxaldehyde, 5-chloro-                                | Heterocyclic compound | -             | SAFE    | -            | down         |              |
| Ethyl 2-(5-methyl-5-vinyltetrahydrofuran-2-yl)propan-2-yl carbonate | Heterocyclic compound | -             | HS-SPME | down         | down         |              |
| 2-Hydroxymethylbenzimidazole                                        | Heterocyclic compound | -             | HS-SPME | up           | -            | -            |

| Compounds                                                                                                            | Class                 | Odour quality               | Method  | Type         |              |              |
|----------------------------------------------------------------------------------------------------------------------|-----------------------|-----------------------------|---------|--------------|--------------|--------------|
|                                                                                                                      |                       |                             |         | M-G1_vs_M-GS | M-G2_vs_M-GS | M-G2_vs_M-G1 |
| 1-Pentanone, 1-(2-thienyl)-                                                                                          | Heterocyclic compound | -                           | SAFE    | down         | down         |              |
| 4,4'-Bitriazolyl                                                                                                     | Heterocyclic compound | -                           | SAFE    | up           | up           | -            |
| 1,4-Methano-1H-Cyclopropa[d]pyridazine, 4,4a,5,5a-tetrahydro-6,6-dimethyl-, (1.alpha.,4.alpha.,4a.alpha.,5a.alpha.)- | Heterocyclic compound | -                           | SAFE    | up           | up           | -            |
| 2,5-Furandione, 3-methyl-4-propyl-                                                                                   | Heterocyclic compound | -                           | SAFE    | down         | down         |              |
| 5-Isopropyl-3,3-dimethyl-2-methylene-2,3-dihydrofuran                                                                | Heterocyclic compound | -                           | SAFE    | up           | up           | -            |
| 1H-Pyrrole-2,5-dione, 3-ethenyl-4-methyl-                                                                            | Heterocyclic compound | -                           | SAFE    | up           | up           | -            |
| 1H-Imidazole-4-methanol                                                                                              | Heterocyclic compound | -                           | SAFE    | -            | up           | -            |
| Cobalt, bis(.eta.-5-piperidinylcyclopentadienyl)-                                                                    | Heterocyclic compound | -                           | HS-SPME | down         | -            |              |
| 2,3,5-Trimethyl-6-ethylpyrazine                                                                                      | Heterocyclic compound | -                           | SAFE    | down         | down         | down         |
| N-Benzoyloxy-2-carbomethoxyaziridine                                                                                 | Heterocyclic compound | -                           | SAFE    | up           | up           | -            |
| Isomaltol                                                                                                            | Heterocyclic compound | burnt、<br>caramellic、fruity | SAFE    | up           | -            | -            |
| (2R,4aS,5S,8aS)-2,5-Dipentyldecahydroquinoline                                                                       | Heterocyclic compound | -                           | SAFE    | down         | down         |              |

| Compounds                                                           | Class                 | Odour quality | Method  | Type         |              |              |
|---------------------------------------------------------------------|-----------------------|---------------|---------|--------------|--------------|--------------|
|                                                                     |                       |               |         | M-G1_vs_M-GS | M-G2_vs_M-GS | M-G2_vs_M-G1 |
| 3-Formyl-4,5-dimethyl-pyrrole                                       | Heterocyclic compound | -             | HS-SPME | down         | down         |              |
| diethylboryl-.delta.-Valerolactam                                   | Heterocyclic compound | -             | HS-SPME | up           | up           | -            |
| 2-Thiopheneacetic acid, but-3-yn-2-yl ester                         | Heterocyclic compound | -             | HS-SPME | -            | down         |              |
| (5S,8R,8aS)-8-Methyl-5-((Z)-pent-2-en-4-yn-1-yl)octahydroindolizine | Heterocyclic compound | -             | HS-SPME | -            | down         |              |
| 6-methyl-3(2H)-Pyridazinone                                         | Heterocyclic compound | -             | HS-SPME | down         | down         |              |
| 4,6-dimethyl-2-Pyridinemethanol,acetate (ester)                     | Heterocyclic compound | -             | HS-SPME | down         | down         |              |
| 2,3-dihydro-4H-1-Benzopyran-4-one                                   | Heterocyclic compound | -             | HS-SPME | down         | down         |              |
| 2-Formyl-4,5-dimethyl-pyrrole                                       | Heterocyclic compound | -             | HS-SPME | down         | down         |              |
| Adamantane                                                          | Hydrocarbons          | -             | SAFE    | down         | down         |              |
| Octane                                                              | Hydrocarbons          | gasoline      | SAFE    | up           | up           | -            |
| Nonane                                                              | Hydrocarbons          | gasoline      | SAFE    | up           | up           | -            |
| Decane                                                              | Hydrocarbons          | -             | HS-SPME | down         | -            |              |
| Dodecane                                                            | Hydrocarbons          | -             | HS-SPME | down         | -            |              |
| Tetradecane                                                         | Hydrocarbons          | -             | HS-SPME | down         | -            |              |
| 4-methyl-1-(1-methylethyl)-Bicyclo[3.1.0]hex-2-ene                  | Hydrocarbons          | -             | HS-SPME | -            | up           | -            |
| 1-Nonene, 4,6,8-trimethyl-                                          | Hydrocarbons          | -             | SAFE    | up           | up           | -            |

| Compounds                                                    | Class        | Odour quality             | Method  | Type         |              |              |
|--------------------------------------------------------------|--------------|---------------------------|---------|--------------|--------------|--------------|
|                                                              |              |                           |         | M-G1_vs_M-GS | M-G2_vs_M-GS | M-G2_vs_M-G1 |
| Heptadecane, 2-methyl-                                       | Hydrocarbons | -                         | SAFE    | down         | down         |              |
| Tetradecane, 2,6,10-trimethyl-                               | Hydrocarbons | -                         | SAFE    | down         | down         |              |
| E-1-Methoxy-4-hexene                                         | Hydrocarbons | -                         | SAFE    | up           | up           | -            |
| Cyclohexene, 4-methyl-1-(1-methylethenyl)-                   | Hydrocarbons | -                         | SAFE    | up           | up           | -            |
| Undecane, 3,6-dimethyl-                                      | Hydrocarbons | -                         | HS-SPME | -            | down         |              |
| Albene                                                       | Hydrocarbons | -                         | SAFE    | up           | up           | -            |
| 1-Hexen, 2-(p-anisyl)-5-methyl-                              | Hydrocarbons | -                         | HS-SPME | up           | up           | -            |
| 1,5-Heptadiene, 2,6-dimethyl-                                | Hydrocarbons | -                         | SAFE    | -            | down         |              |
| Octane, 2,6,6-trimethyl-                                     | Hydrocarbons | -                         | HS-SPME | down         | down         |              |
| Nonane, 3-methyl-5-propyl-                                   | Hydrocarbons | -                         | SAFE    | up           | up           | -            |
| 3-ethyl-Undecane                                             | Hydrocarbons | -                         | HS-SPME | -            | up           | -            |
| 2-butyl-1,3,3-trimethyl-Cyclohexene                          | Hydrocarbons | -                         | HS-SPME | -            | down         |              |
| Hexacosane                                                   | Hydrocarbons | -                         | SAFE    | down         | down         |              |
| 3-Hexanone, 1-phenyl-                                        | Ketone       | -                         | SAFE    | up           | up           | -            |
| Cyclopentanone, 2-(2-hexenyl)-                               | Ketone       | floral                    | SAFE    | down         | down         |              |
| 4-Acetylanisole                                              | Ketone       | anisic                    | HS-SPME | up           | up           | -            |
| 2-methyl-3-Pentanone                                         | Ketone       | mint                      | SAFE    | down         | down         |              |
| 2-Heptanone                                                  | Ketone       | cheesy                    |         | -            | -            | down         |
| 5-Hepten-2-one, 6-methyl-                                    | Ketone       | citrus                    | SAFE    | up           | -            | -            |
| (5Z)-Octa-1,5-dien-3-one                                     | Ketone       | green                     | HS-SPME | down         | -            | up           |
| 3,5-Octadien-2-one                                           | Ketone       | fatty、fruity、<br>mushroom | HS-SPME | up           | up           | -            |
| 2-Cyclohexen-1-one, 4-(3-hydroxy-1-butenyl)-3,5,5-trimethyl- | Ketone       | spicy                     | SAFE    | up           | up           | -            |

| Compounds                                             | Class  | Odour quality         | Method  | Type         |              |              |
|-------------------------------------------------------|--------|-----------------------|---------|--------------|--------------|--------------|
|                                                       |        |                       |         | M-G1_vs_M-GS | M-G2_vs_M-GS | M-G2_vs_M-G1 |
| 1,2-Propanedione, 1-phenyl-                           | Ketone | plastic、buttery、honey | SAFE    | up           | up           | -            |
| 2-Butanone, 4-(4-hydroxy-3-methoxyphenyl)-            | Ketone | spicy                 | SAFE    | up           | up           | -            |
| Methanone, (4-hydroxyphenyl)phenyl-                   | Ketone | -                     | SAFE    | up           | up           | -            |
| Isophorone                                            | Ketone | woody                 | SAFE    | up           | up           | -            |
| Acetophenone, 4'-hydroxy-                             | Ketone | floral                | SAFE    | up           | up           | -            |
| Ethanone, 1-(2-methyl-1-cyclopenten-1-yl)-            | Ketone | -                     | SAFE    | up           | up           | -            |
| 3,5-Octadien-2-one, (E,E)-                            | Ketone | fruity、green、grassy   | SAFE    | up           | up           | -            |
| 1H-Pyrrole-2,5-dione, 3-ethyl-4-methyl-               | Ketone | -                     | HS-SPME | up           | up           | -            |
| 2-Cyclopenten-1-one, 3-methyl-2-(2-pentenyl)-, (Z)-   | Ketone | floral                | HS-SPME | down         | down         |              |
| Cyclohexanone, 2,2,6-trimethyl-                       | Ketone | thujonic、pungent      | SAFE    | up           | up           | -            |
| Ethanone, 1-(3-hydroxyphenyl)-                        | Ketone | -                     | SAFE    | up           | up           | -            |
| 2-Cyclohexen-1-one, 3-methyl-                         | Ketone | nutty                 | SAFE    | up           | up           | -            |
| 1-Butanone, 2-hydroxy-1-phenyl-                       | Ketone | -                     | SAFE    | up           | -            | -            |
| Ethanone, 1-(1H-pyrazol-4-yl)-                        | Ketone | -                     | HS-SPME | up           | up           | -            |
| Ethanone, 1-(2,4-dimethylphenyl)-                     | Ketone | floral                | SAFE    | up           | up           | -            |
| 2,6,6-Trimethyl-2-cyclohexene-1,4-dione               | Ketone | musty、woody、sweet、tea | SAFE    | up           | up           | -            |
| 2-Buten-1-one, 1-(2,6,6-trimethyl-1-cyclohexen-1-yl)- | Ketone | fruity                | HS-SPME | up           | up           | -            |
| Ethanone, 1-(1,3-dimethyl-3-cyclohexen-1-yl)-         | Ketone | -                     | SAFE    | up           | up           | -            |
| 2(1H)-Naphthalenone, 3,4,5,6,7,8-hexahydro-           | Ketone | -                     | SAFE    | up           | up           | -            |
| 4-Isopropyl-1,3-cyclohexanedione                      | Ketone | -                     | SAFE    | -            | down         |              |
| 2-Pentadecanone                                       | Ketone | floral                | SAFE    | down         | down         |              |

| Compounds                                                         | Class              | Odour quality          | Method  | Type         |              |              |
|-------------------------------------------------------------------|--------------------|------------------------|---------|--------------|--------------|--------------|
|                                                                   |                    |                        |         | M-G1_vs_M-GS | M-G2_vs_M-GS | M-G2_vs_M-G1 |
| 4,6-Octadiyn-3-one, 2-methyl-                                     | Ketone             | -                      | HS-SPME | down         | down         |              |
| 2-Cyclohexen-1-one, 4-hydroxy-3-methyl-6-(1-methylethyl)-, trans- | Ketone             | -                      | SAFE    | -            | down         |              |
| 4-(2,6,6-Trimethylcyclohexa-1,3-dienyl)but-3-en-2-one             | Ketone             | -                      | HS-SPME | up           | up           | -            |
| 1-(4-tert-Butylphenyl)propan-2-one                                | Ketone             | -                      | HS-SPME | up           | up           | -            |
| 5-methyl-1,2,5,6-Tetrahydropyridin-2-one                          | Nitrogen compounds | -                      | HS-SPME | down         | down         |              |
| 1-isocyano-3-methyl-Benzene                                       | Nitrogen compounds | -                      | HS-SPME | down         | down         | down         |
| Butanoic acid, anhydride                                          | Others             | butter                 | SAFE    | up           | up           | -            |
| Hydroquinone                                                      | Phenol             | -                      | SAFE    | -            | up           | -            |
| 2-methoxy-Phenol                                                  | Phenol             | phenolic               | SAFE    | up           | up           | -            |
| p-Cresol                                                          | Phenol             | phenolic               | SAFE    | down         | down         |              |
| Phenol, 3-methyl-                                                 | Phenol             | phenolic               | SAFE    | down         | down         |              |
| Phenol, 4-propyl-                                                 | Phenol             | phenolic、<br>medicinal | SAFE    | up           | up           | -            |
| Phenol, 2-(1,1-dimethylethyl)-                                    | Phenol             | -                      | SAFE    | up           | up           | -            |
| Phenol, 4,4'-methylenebis-                                        | Phenol             | -                      | SAFE    | down         | down         |              |
| Phenol, 2-(1-methylpropyl)-                                       | Phenol             | -                      | SAFE    | up           | up           | -            |
| 1H-Inden-5-ol, 2,3-dihydro-                                       | Phenol             | -                      | HS-SPME | down         | down         | down         |
| 8,9-Dehydrothymol                                                 | Phenol             | -                      | SAFE    | down         | down         |              |
| Phenol, 2,4,6-tris(1-methylethyl)-                                | Phenol             | -                      | HS-SPME | -            | down         |              |
| Diallyl disulphide                                                | Sulfur compounds   | alliaceous、 onion      | SAFE    | up           | -            | -            |

| Compounds                                                                                        | Class            | Odour quality                   | Method  | Type         |              |              |
|--------------------------------------------------------------------------------------------------|------------------|---------------------------------|---------|--------------|--------------|--------------|
|                                                                                                  |                  |                                 |         | M-G1_vs_M-GS | M-G2_vs_M-GS | M-G2_vs_M-G1 |
| Furan, 2-[(methylthio)methyl]-                                                                   | Sulfur compounds | alliacous、<br>sulfurous、roasted | SAFE    | up           | up           | -            |
| 3-Cyclohexene-1-methanethiol, .alpha.,.alpha.,4-trimethyl-                                       | Sulfur compounds | citrus                          | SAFE    | up           | up           | -            |
| Thiocyanic acid, phenylmethyl ester                                                              | Sulfur compounds | -                               | SAFE    | -            | up           | -            |
| Benzene, (isothiocyanatomethyl)-                                                                 | Sulfur compounds | watercress                      | SAFE    | up           | up           | -            |
| TriSulfur compounds, dipropyl                                                                    | Sulfur compounds | sulfurous、<br>alliacous         | SAFE    | down         | down         |              |
| 2-Methylthiolane, S,S-dioxide<br>(1aR,1bS,2aS,5S,5aS,7aS)-2,2,5,7a-                              | Sulfur compounds | -                               | HS-SPME | down         | down         | down         |
| Tetramethyldecahydrocyclopenta[2',3']cyclobuta[1',2':3,4]benzo[1,<br>2-b]oxirene                 | Terpenoids       | -                               | SAFE    | up           | up           | -            |
| Cyclohexene, 4-[(1E)-1,5-dimethyl-1,4-hexadien-1-yl]-1-methyl-                                   | Terpenoids       | -                               | SAFE    | down         | down         | down         |
| .beta.-Acorenol                                                                                  | Terpenoids       | -                               | SAFE    | up           | up           | -            |
| (5R,10R)-10-Methyl-6-methylene-2-(propan-2-<br>ylidene)spiro[4.5]dec-7-ene                       | Terpenoids       | -                               | SAFE    | up           | up           | -            |
| Naphthalene, decahydro-1,6-bis(methylene)-4-(1-methylethyl)-,<br>(4.alpha.,4a.alpha.,8a.alpha.)- | Terpenoids       | -                               | SAFE    | -            | down         | down         |
| Kessane                                                                                          | Terpenoids       | -                               | SAFE    | down         | down         |              |
| Carvone oxide, trans-                                                                            | Terpenoids       | -                               | SAFE    | up           | up           | -            |
| .alpha.-Pinene                                                                                   | Terpenoids       | herbal                          | SAFE    | up           | up           | -            |
| 3-Carene                                                                                         | Terpenoids       | citrus                          | SAFE    | -            | up           | up           |
| Linalool                                                                                         | Terpenoids       | floral                          | SAFE    | down         | down         |              |
| Bicyclo[3.1.0]hexan-2-ol, 2-methyl-5-(1-methylethyl)-,<br>(1.alpha.,2.alpha.,5.alpha.)-          | Terpenoids       | woody、balsam                    | SAFE    | up           | up           | -            |

| Compounds                                                              | Class      | Odour quality            | Method  | Type         |              |              |
|------------------------------------------------------------------------|------------|--------------------------|---------|--------------|--------------|--------------|
|                                                                        |            |                          |         | M-G1_vs_M-GS | M-G2_vs_M-GS | M-G2_vs_M-G1 |
| 2-Methylisoborneol                                                     | Terpenoids | earthy、 musty            | HS-SPME | down         | down         |              |
| 4-Hexen-1-ol, 5-methyl-2-(1-methylethenyl)-, (R)-                      | Terpenoids | herbal                   | SAFE    | up           | up           | -            |
| Carveol                                                                | Terpenoids | minty                    | SAFE    | -            | down         | down         |
| 2,6-Octadienal, 3,7-dimethyl-, (Z)-                                    | Terpenoids | citrus                   | SAFE    | up           | up           | -            |
| 4-(1-methylethyl)-Benzaldehyde                                         | Terpenoids | spicy                    | SAFE    | down         | down         |              |
| safranal                                                               | Terpenoids | herbal                   | SAFE    | up           | up           | down         |
| (-)-.beta.-Bourbonene                                                  | Terpenoids | herbal、 woody、<br>floral | SAFE    | -            | down         |              |
| .alpha.-Ionone                                                         | Terpenoids | floral                   | HS-SPME | up           | up           | -            |
| (E)-.beta.-Farnesene                                                   | Terpenoids | woody、 citrus、<br>herbal | HS-SPME | down         | down         | down         |
| trans-.beta.-Ionone                                                    | Terpenoids | floral                   | HS-SPME | -            | up           | -            |
| Humulene                                                               | Terpenoids | woody                    | SAFE    | up           | up           | -            |
| 1,3-Cyclohexadiene, 5-(1,5-dimethyl-4-hexenyl)-2-methyl-, [S-(R*,S*)]- | Terpenoids | spicy fresh sharp        | SAFE    | up           | up           | -            |
| .gamma.-Muurolene                                                      | Terpenoids | woody                    | SAFE    | up           | -            | -            |
| (1S,2E,6E,10R)-3,7,11,11-Tetramethylbicyclo[8.1.0]undeca-2,6-diene     | Terpenoids | green、 woody、<br>weedy   | SAFE    | up           | up           | -            |
| .alpha.-Farnesene                                                      | Terpenoids | woody                    | HS-SPME | down         | down         | down         |
| Cyclohexene, 3-(1,5-dimethyl-4-hexenyl)-6-methylene-, [S-(R*,S*)]-     | Terpenoids | herbal、 fruity、<br>woody | SAFE    | down         | down         |              |
| (E)-nerolidol                                                          | Terpenoids | floral                   | HS-SPME | down         | down         |              |
| (E)-linalool oxide (pyranoid)                                          | Terpenoids |                          |         |              |              |              |
| 3-Buten-2-one, 4-(2,2,6-trimethyl-7-oxabicyclo[4.1.0]hept-1-yl)-       | Terpenoids | fruity                   | HS-SPME | up           | up           | -            |

| Compounds                                                                              | Class      | Odour quality             | Method  | Type         |              |              |
|----------------------------------------------------------------------------------------|------------|---------------------------|---------|--------------|--------------|--------------|
|                                                                                        |            |                           |         | M-G1_vs_M-GS | M-G2_vs_M-GS | M-G2_vs_M-G1 |
| .alpha.-Cadinol                                                                        | Terpenoids | woody, herbal             | SAFE    | up           | up           | -            |
| 10-epi-.gamma.-Eudesmol                                                                | Terpenoids | woody                     | SAFE    | up           | up           | -            |
| Fenchone                                                                               | Terpenoids | -                         | SAFE    | up           | up           | -            |
| (E)-4,8-Dimethylnona-1,3,7-triene                                                      | Terpenoids | -                         | SAFE    | up           | -            | down         |
| L-.alpha.-Terpineol                                                                    | Terpenoids | terpenic、lilac、<br>floral | HS-SPME | -            | down         |              |
| (+)-neodihydrocarveol                                                                  | Terpenoids | -                         | SAFE    | up           | up           | -            |
| D-Verbenone                                                                            | Terpenoids | -                         | SAFE    | up           | up           | -            |
| 2,6-Octadien-1-ol, 3,7-dimethyl-                                                       | Terpenoids | -                         | SAFE    | down         | -            |              |
| 2-Cyclohexen-1-one, 2-hydroxy-3-methyl-6-(1-methylethyl)-                              | Terpenoids | minty                     | SAFE    | up           | up           | -            |
| Furan, 3-(4,8-dimethyl-3,7-nonadienyl)-, (E)-                                          | Terpenoids | -                         | SAFE    | up           | up           | -            |
| 3-Hydroxy-7,8-dihydro-.beta.-ionol                                                     | Terpenoids | -                         | SAFE    | up           | up           | -            |
| Eremophilene                                                                           | Terpenoids | -                         | SAFE    | up           | up           | -            |
| Pinocarvone                                                                            | Terpenoids | minty                     | SAFE    | down         | -            |              |
| beta-Element                                                                           | Terpenoids | sweet                     | SAFE    | up           | up           | -            |
| Pinocamphone                                                                           | Terpenoids | spicy                     | SAFE    | up           | up           | -            |
| (+)-alpha-Pinene                                                                       | Terpenoids | herbal                    | SAFE    | up           | up           | -            |
| d-Nerolidol                                                                            | Terpenoids | floral                    | SAFE    | down         | -            |              |
| Benzene, 1-(1,5-dimethylhexyl)-4-methyl-                                               | Terpenoids | -                         | HS-SPME | -            | down         |              |
| (+)-3-Carene                                                                           | Terpenoids | sweet                     | SAFE    | -            | up           | up           |
| 1,3,6,10-Cyclotetradecatetraene, 3,7,11-trimethyl-14-(1-methylethyl)-, [S-(E,Z,E,E)]-  | Terpenoids | -                         | SAFE    | -            | up           | -            |
| (1R,4R,4aS,8aR)-4,7-Dimethyl-1-(prop-1-en-2-yl)-1,2,3,4,4a,5,6,8a-octahydronaphthalene | Terpenoids | -                         | SAFE    | up           | -            | down         |

| Compounds                                                                                                                                                                       | Class      | Odour quality         | Method | Type         |              |              |
|---------------------------------------------------------------------------------------------------------------------------------------------------------------------------------|------------|-----------------------|--------|--------------|--------------|--------------|
|                                                                                                                                                                                 |            |                       |        | M-G1_vs_M-GS | M-G2_vs_M-GS | M-G2_vs_M-G1 |
| (2R,3R,6S)-6-Isopropyl-3-methyl-2-(prop-1-en-2-yl)-3-vinylcyclohexanone                                                                                                         | Terpenoids | -                     | SAFE   | up           | up           | -            |
| [1 $\alpha$ ,4 $\alpha\alpha$ ,8 $\alpha\alpha$ ]-1,2,4 $\alpha$ ,5,6,8 $\alpha$ -hexahydro-4-7-dimethyl-1-[1-methylethyl]naphthalene                                           | Terpenoids | -                     | SAFE   | up           | up           | -            |
| (1S,4S,4 $\alpha$ S)-1-Isopropyl-4,7-dimethyl-1,2,3,4,4 $\alpha$ ,5-hexahydronaphthalene                                                                                        | Terpenoids | -                     | SAFE   | up           | down         | down         |
| Benzene, 1-methyl-4-(1,2,2-trimethylcyclopentyl)-, (R)-                                                                                                                         | Terpenoids | -                     | SAFE   | down         | down         |              |
| 1,1,7,7a-Tetramethyl-1a,2,6,7,7a,7b-hexahydro-1H-cyclopropa[a]naphthalene                                                                                                       | Terpenoids | -                     | SAFE   | up           | up           | -            |
| .alpha.-Corocalene                                                                                                                                                              | Terpenoids | -                     | SAFE   | -            | up           | -            |
| Bicyclo[3.1.1]hept-2-ene, 2,6-dimethyl-6-(4-methyl-3-pentenyl)-                                                                                                                 | Terpenoids | -                     | SAFE   | up           | up           | -            |
| Bicyclo[2.2.1]heptane, 2-chloro-1,7,7-trimethyl-, (1R-endo)-                                                                                                                    | Terpenoids | -                     | SAFE   | up           | up           | -            |
| Bicyclo[3.1.1]hept-3-en-2-one, 4,6,6-trimethyl-, (1S)-                                                                                                                          | Terpenoids | spicy、<br>camphoreous | SAFE   | up           | -            | -            |
| 1-Phenanthrenecarboxaldehyde, 1,2,3,4,4 $\alpha$ ,9,10,10 $\alpha$ -octahydro-1,4 $\alpha$ -dimethyl-7-(1-methylethyl)-, [1R-(1.alpha.,4 $\alpha$ .beta.,10 $\alpha$ .alpha.)]- | Terpenoids | -                     | SAFE   | down         | down         |              |
| (-)-Aristolene                                                                                                                                                                  | Terpenoids | -                     | SAFE   | up           | -            | down         |
| Palustrol (Ledum)                                                                                                                                                               | Terpenoids | -                     | SAFE   | down         | down         |              |
| Bicyclo[3.1.0]hex-2-ene, 4-methylene-1-(1-methylethyl)-                                                                                                                         | Terpenoids | -                     | SAFE   | down         | -            |              |
| Valerena-4,7(11)-diene                                                                                                                                                          | Terpenoids | -                     | SAFE   | -            | down         | down         |
| Cyclopropanecarboxylic Acid, 2,2-dimethyl-3-(2-methyl-1-propenyl)-, (1R-trans)-                                                                                                 | Terpenoids | -                     | SAFE   | up           | up           | -            |

| Compounds                                                                                                           | Class      | Odour quality | Method  | Type         |              |              |
|---------------------------------------------------------------------------------------------------------------------|------------|---------------|---------|--------------|--------------|--------------|
|                                                                                                                     |            |               |         | M-G1_vs_M-GS | M-G2_vs_M-GS | M-G2_vs_M-G1 |
| 1(2H)-Naphthalenone, 3,4,4a,5,6,7-hexahydro-4a,5-dimethyl-3-(1-methylethenyl)-, [3S-(3.alpha.,4a.alpha.,5.alpha.)]- | Terpenoids | -             | SAFE    | up           | up           | -            |
| Longifolenaldehyde                                                                                                  | Terpenoids | -             | SAFE    | up           | up           | -            |
| Tricyclo[2.2.1.0(2,6)]heptane-3-methanol, 2,3-dimethyl-                                                             | Terpenoids | -             | SAFE    | up           | up           | -            |
| 1-Isopropyl-4,7-dimethyl-1,2,3,5,6,8a-hexahydronaphthalene                                                          | Terpenoids | -             | SAFE    | up           | up           | down         |
| Carvenone                                                                                                           | Terpenoids | minty         | SAFE    | up           | up           | -            |
| (1R,5R)-2-Methyl-5-((R)-6-methylhept-5-en-2-yl)bicyclo[3.1.0]hex-2-ene                                              | Terpenoids | -             | HS-SPME | down         | down         | down         |
| (R)-5,7-dimethyl-1,6-Octadiene                                                                                      | Terpenoids | -             | HS-SPME | -            | down         | -            |

Table S3. Different aroma components of tencha ground into matcha.

| Compounds                                                  | Class   | Odour quality        | Type         |              |              |
|------------------------------------------------------------|---------|----------------------|--------------|--------------|--------------|
|                                                            |         |                      | T-GS_vs_M-GS | T-G1_vs_M-G1 | T-G2_vs_M-G2 |
| CyclohexanAmine, N-cyclohexyl-                             | Amine   | -                    | up           | -            | -            |
| BenzenAmine, 2-methoxy-5-nitro-                            | Amine   | -                    | down         | -            | -            |
| 5H-Tetrazol-5-Amine                                        | Amine   | -                    | -            | down         | -            |
| Formamide, N-phenyl-                                       | Amine   | -                    | up           | up           | -            |
| 1,6-HexanediAmine, N,N,N',N'-tetramethyl-                  | Amine   | -                    | -            | up           | up           |
| Glycerin                                                   | Alcohol | -                    | down         | up           | up           |
| Ethanol, 2-(3,3-dimethylcyclohexylidene)-, (Z)-            | Alcohol | -                    | -            | up           | up           |
| Cyclobutaneethanol, 1-methyl-2-(1-methylethenyl)-, cis-    | Alcohol | -                    | up           | -            | -            |
| 2,4-Heptadien-1-ol, (E,E)-                                 | Alcohol | fatty、green、fruity   | -            | down         | down         |
| 1-Hexanol, 3,5,5-trimethyl-                                | Alcohol | green                | down         | down         | down         |
| (S)-2,5-Dimethyl-3-vinylhex-4-en-2-ol                      | Alcohol | -                    | up           | -            | -            |
| 1-Pentanol                                                 | Alcohol | fermented、oily、sweet | -            | down         | -            |
| 3-Hexen-1-ol, (Z)-                                         | Alcohol | green                | up           | -            | -            |
| 2-Octen-1-ol, (E)-                                         | Alcohol | green                | -            | up           | up           |
| 1-Decanol                                                  | Alcohol | fatty                | down         | up           | up           |
| 3,6-Nonadien-1-ol, (E,Z)-                                  | Alcohol | green                | up           | -            | -            |
| 1,2-Octanediol                                             | Alcohol | -                    | -            | up           | up           |
| Batilol                                                    | Alcohol | -                    | down         | -            | -            |
| Ethanol, 2-butoxy-                                         | Alcohol | -                    | -            | up           | up           |
| 3,7-Octadiene-2,6-diol, 2,6-dimethyl-                      | Alcohol | -                    | up           | down         | -            |
| 6-Nonen-1-ol, (E)-                                         | Alcohol | -                    | -            | up           | up           |
| 2-Decen-1-ol, (E)-                                         | Alcohol | fatty                | -            | up           | up           |
| Cyclohexanemethanol, .alpha.,.alpha.-dimethyl-4-methylene- | Alcohol | -                    | up           | up           | up           |

| Compounds                                                      | Class     | Odour quality            | Type         |              |              |
|----------------------------------------------------------------|-----------|--------------------------|--------------|--------------|--------------|
|                                                                |           |                          | T-GS_vs_M-GS | T-G1_vs_M-G1 | T-G2_vs_M-G2 |
| Cyclohexanol, 1-ethenyl-                                       | Alcohol   | -                        | up           | up           | up           |
| 6-Undecanol                                                    | Alcohol   | -                        | up           | -            | -            |
| 4-Hexen-1-ol, acetate                                          | Alcohol   | -                        | up           | up           | up           |
| Benzenemethanol, .alpha.-methyl-.alpha.-(1-methyl-2-propenyl)- | Alcohol   | -                        | up           | up           | up           |
| (2,2,6-Trimethyl-bicyclo[4.1.0]hept-1-yl)-methanol             | Alcohol   | -                        | -            | up           | up           |
| 3,7,11,15-tetramethyl-1-Hexadecyn-3-ol                         | Alcohol   | -                        | -            | up           | -            |
| Benzene, (2,2-dimethoxyethyl)-                                 | Aromatics | green                    | up           | up           | up           |
| Benzene, 1,2,4-trimethyl-                                      | Aromatics | -                        | -            | up           | up           |
| Cyclohexene, 1-methoxy-                                        | Aromatics | herbal                   | -            | up           | up           |
| Benzene, 1,2,4,5-tetramethyl-                                  | Aromatics | sweet                    | down         | -            | -            |
| Benzene, (2-nitroethyl)-                                       | Aromatics | flower、spice             | up           | -            | -            |
| Estragole                                                      | Aromatics | anistic                  | down         | -            | -            |
| Naphthalene                                                    | Aromatics | pungent                  | down         | down         | down         |
| Naphthalene, 1,2,3,4-tetrahydro-                               | Aromatics | -                        | down         | -            | -            |
| Triphenylene                                                   | Aromatics | -                        | up           | up           | up           |
| Benzene, 1-ethyl-3-methyl-                                     | Aromatics | -                        | -            | up           | up           |
| Benzene, 1-ethyl-2-methyl-                                     | Aromatics | -                        | down         | -            | -            |
| Naphthalene, 1-methyl-                                         | Aromatics | naphthyl、<br>camphoreous | -            | up           | up           |
| TRANS-ANETHOLE                                                 | Aromatics | licorice                 | down         | -            | -            |
| Benzene, 1,2-dichloro-                                         | Aromatics | -                        | -            | down         | down         |
| Benzene, 1,4-dichloro-                                         | Aromatics | -                        | up           | -            | -            |
| Asarone                                                        | Aromatics | -                        | down         | -            | -            |
| Mesitylene                                                     | Aromatics | -                        | down         | down         | down         |

| Compounds                                          | Class              | Odour quality              | Type         |              |              |
|----------------------------------------------------|--------------------|----------------------------|--------------|--------------|--------------|
|                                                    |                    |                            | T-GS_vs_M-GS | T-G1_vs_M-G1 | T-G2_vs_M-G2 |
| p-Xylene                                           | Aromatics          | Plastic, green,<br>pungent | up           | -            | -            |
| Hydrazine, (4-methoxyphenyl)-                      | Aromatics          | -                          | down         | -            | -            |
| .alpha.-Methylstyrene                              | Aromatics          | -                          | up           | up           | up           |
| Naphthalene, 2-methyl-                             | Aromatics          | floral                     | -            | -            | down         |
| Benzene, pentamethyl-                              | Aromatics          | -                          | -            | down         | down         |
| Benzene, 1,2-diethyl-3,4-dimethyl-                 | Aromatics          | -                          | down         | -            | -            |
| (5-bromopentyl)-Benzene,                           | Aromatics          | -                          | up           | -            | -            |
| Benzene, 2-ethyl-1,4-dimethyl-                     | Aromatics          | -                          | up           | -            | -            |
| Naphthalene, 1,2,3,4,4a,5,6,7-octahydro-4a-methyl- | Aromatics          | -                          | up           | -            | up           |
| Naphthalene, 1,2-dihydro-4,5,7-trimethyl-          | Aromatics          | -                          | -            | -            | down         |
| Hydroquinone                                       | Phenol             | -                          | -            | up           | up           |
| p-Cresol                                           | Phenol             | phenolic                   | up           | up           | up           |
| Phenol, 3-methyl-                                  | Phenol             | phenolic                   | -            | up           | up           |
| Phenol, 4-propyl-                                  | Phenol             | phenolic、 medicinal        | up           | -            | -            |
| Phenol, 4-(1-methyl-1-phenylethyl)-                | Phenol             | -                          | -            | -            | up           |
| Phenol, 4,4'-methylenebis-                         | Phenol             | -                          | down         | -            | -            |
| 1H-Inden-5-ol, 2,3-dihydro-                        | Phenol             | -                          | down         | -            | -            |
| Phenol, 2,5-bis(1-methylpropyl)-                   | Phenol             | -                          | -            | down         | -            |
| 8,9-Dehydrothymol                                  | Phenol             | -                          | down         | -            | -            |
| Phenol, 2,4,6-tris(1-methylethyl)-                 | Phenol             | -                          | -            | down         | -            |
| 2-(1,1-Dimethylethyl)-6-(1-methylethyl)phenol      | Phenol             | -                          | -            | down         | -            |
| Tricyclo[3.3.1.1(3,7)]decane, 2-nitro-             | Nitrogen compounds | -                          | -            | up           | up           |
| 5-methyl-1,2,5,6-Tetrahydropyridin-2-one           | Nitrogen compounds | -                          | -            | up           | -            |

| Compounds                                                  | Class                    | Odour quality        | Type         |              |              |
|------------------------------------------------------------|--------------------------|----------------------|--------------|--------------|--------------|
|                                                            |                          |                      | T-GS_vs_M-GS | T-G1_vs_M-G1 | T-G2_vs_M-G2 |
| 3-Cyclohexene-1-methanethiol, .alpha.,.alpha.,4-trimethyl- | Sulfur compounds         | citrus               | -            | -            | up           |
| TriSulfur compounds, dipropyl                              | Sulfur compounds         | sulfurous            | down         | -            | -            |
| 2-Methylthiolane, S,S-dioxide                              | Sulfur compounds         | -                    | -            | -            | down         |
| 1-iodo-Decane                                              | Halogenated hydrocarbons | -                    | up           | down         | -            |
| Dimethylphosphinic fluoride                                | Halogenated hydrocarbons | -                    | -            | up           | -            |
| 1-iodo-Hexadecane                                          | Halogenated hydrocarbons | -                    | up           | -            | -            |
| Benzene, (methoxymethyl)-                                  | Ether                    | fruity               | -            | up           | -            |
| Butane, 1,1'-oxybis[4-chloro-                              | Ether                    | -                    | -            | up           | up           |
| Nonane, 1-iodo-                                            | Other                    | -                    | -            | -            | down         |
| 3-Cyclohexene-1-carboxAldehyde, 4-(4-methyl-3-pentenyl)-   | Aldehyde                 | citrus、floral、marine | down         | -            | -            |
| (E)-2-Decenal                                              | Aldehyde                 | fatty                | -            | up           | up           |
| Hexanal                                                    | Aldehyde                 | green                | down         | -            | -            |
| Heptanal                                                   | Aldehyde                 | green                | -            | down         | -            |
| BenzAldehyde                                               | Aldehyde                 | fruity               | up           | up           | -            |
| BenzeneacetAldehyde                                        | Aldehyde                 | green                | up           | -            | -            |
| (E)-2-Octenal                                              | Aldehyde                 | fatty                | -            | up           | up           |
| 2-Nonenal                                                  | Aldehyde                 | green、waxy、cucumber  | -            | -            | up           |
| 4-Isopropylcyclohexa-1,3-dienecarbAldehyde                 | Aldehyde                 | fatty、spicy          | -            | up           | up           |
| Undecanal                                                  | Aldehyde                 | waxy、green           | down         | -            | -            |

| Compounds                                                                                                      | Class      | Odour quality              | Type         |              |              |
|----------------------------------------------------------------------------------------------------------------|------------|----------------------------|--------------|--------------|--------------|
|                                                                                                                |            |                            | T-GS_vs_M-GS | T-G1_vs_M-G1 | T-G2_vs_M-G2 |
| 2-FurAldehyde diethyl acetal                                                                                   | Aldehyde   | fruity、earthy、<br>mushroom | down         | -            | -            |
| BenzAldehyde, 2-methyl-                                                                                        | Aldehyde   | cherry                     | up           | -            | -            |
| cis-7-Decen-1-al                                                                                               | Aldehyde   | citrus                     | up           | up           | up           |
| BenzeneacetAldehyde, .alpha.-methyl-4-(2-methylpropyl)-                                                        | Aldehyde   | -                          | up           | -            | down         |
| Z-11-Pentadecenal                                                                                              | Aldehyde   | -                          | -            | down         | -            |
| 2,6,6-trimethyl-1-Cyclohexene-1-acetAldehyde                                                                   | Aldehyde   | camphoreous                | -            | -            | down         |
| 2-hydroxy-BenzAldehyde                                                                                         | Aldehyde   | medicinal                  | up           | up           | up           |
| Hexanoic Acid                                                                                                  | Acid       | fatty                      | -            | down         | -            |
| Nonanoic Acid                                                                                                  | Acid       | waxy                       | -            | -            | down         |
| 6-Octenoic Acid, 3,7-dimethyl-                                                                                 | Acid       | green、grassy、floral        | down         | -            | -            |
| 8-Methyl-6-nonenoic Acid                                                                                       | Acid       | -                          | -            | -            | up           |
| 2-Propenoic Acid, 3-phenyl-                                                                                    | Acid       | balsamic                   | down         | down         | -            |
| 9,12,15-Octadecatrienoic Acid, (Z,Z,Z)-                                                                        | Acid       | fatty                      | down         | -            | -            |
| Gamolenic Acid                                                                                                 | Acid       | -                          | down         | -            | -            |
| n-Hexadecanoic Acid                                                                                            | Acid       | waxy                       | up           | up           | -            |
| 1-Methylcyclohexylcarboxylic Acid                                                                              | Acid       | -                          | up           | up           | up           |
| cis-3-Hexenyl cis-3-hexenoate                                                                                  | Acid       | green                      | -            | -            | down         |
| 2-Octenoic Acid                                                                                                | Acid       | -                          | up           | -            | -            |
| Pentanoic Acid, 2-methyl-                                                                                      | Acid       | cheesy                     | -            | up           | -            |
| (1aR,1bS,2aS,5S,5aS,7aS)-2,2,5,7a-Tetramethyldecahydrocyclopenta[2',3']cyclobuta[1',2':3,4]benzo[1,2-b]oxirene | Terpenoids | -                          | up           | down         | -            |
| Kessane                                                                                                        | Terpenoids | -                          | down         | -            | -            |

| Compounds                                                                      | Class      | Odour quality           | Type         |              |              |
|--------------------------------------------------------------------------------|------------|-------------------------|--------------|--------------|--------------|
|                                                                                |            |                         | T-GS_vs_M-GS | T-G1_vs_M-G1 | T-G2_vs_M-G2 |
| .alpha.-Pinene                                                                 | Terpenoids | herbal                  | down         | down         | -            |
| 3-Carene                                                                       | Terpenoids | citrus                  | down         | down         | -            |
| Linalool                                                                       | Terpenoids | floral                  | down         | -            | -            |
| terpinolene                                                                    | Terpenoids | herbal                  | up           | up           | up           |
| Carveol                                                                        | Terpenoids | minty                   | up           | up           | -            |
| (-)-Carvone                                                                    | Terpenoids | minty                   | -            | up           | up           |
| 2-Cyclohexen-1-ol, 3-methyl-6-(1-methylethyl)-, trans-                         | Terpenoids | herbal                  | -            | up           | up           |
| 2,6-Octadienal, 3,7-dimethyl-, (Z)-                                            | Terpenoids | citrus                  | up           | -            | -            |
| 4-(1-methylethyl)-Benzaldehyde                                                 | Terpenoids | spicy                   | down         | -            | -            |
| Geraniol                                                                       | Terpenoids | floral                  | -            | up           | up           |
| safranal                                                                       | Terpenoids | herbal                  | up           | up           | up           |
| (E)-.beta.-Farnesene                                                           | Terpenoids | woody                   | -            | down         | down         |
| .alpha.-Farnesene                                                              | Terpenoids | woody                   | -            | -            | down         |
| Naphthalene, 1,2,3,5,6,8a-hexahydro-4,7-dimethyl-1-(1-methylethyl)-, (1S-cis)- | Terpenoids | herbal                  | -            | -            | down         |
| Cyclohexene, 3-(1,5-dimethyl-4-hexenyl)-6-methylene-, [S-(R*,S*)]-             | Terpenoids | herbal、fruity、<br>woody | down         | -            | -            |
| .alpha.-Calacorene                                                             | Terpenoids | woody                   | -            | down         | -            |
| (E)-4,8-Dimethylnona-1,3,7-triene                                              | Terpenoids | -                       | up           | down         | down         |
| p-Menth-8-en-1-ol, stereoisomer                                                | Terpenoids | -                       | -            | up           | up           |
| (-)-trans-Isopiperitenol                                                       | Terpenoids | -                       | -            | up           | up           |
| 6-Octen-1-ol, 3,7-dimethyl-, (R)-                                              | Terpenoids | floral                  | -            | up           | up           |
| 2,6-Octadien-1-ol, 3,7-dimethyl-                                               | Terpenoids | -                       | -            | up           | up           |
| Bicyclo[2.2.1]heptane-2,5-dione, 1,7,7-trimethyl-                              | Terpenoids | -                       | -            | down         | -            |

| Compounds                                                                                                                          | Class      | Odour quality | Type         |              |              |
|------------------------------------------------------------------------------------------------------------------------------------|------------|---------------|--------------|--------------|--------------|
|                                                                                                                                    |            |               | T-GS_vs_M-GS | T-G1_vs_M-G1 | T-G2_vs_M-G2 |
| 2-Cyclohexen-1-one, 2-hydroxy-3-methyl-6-(1-methylethyl)-                                                                          | Terpenoids | minty         | up           | -            | -            |
| Furan, 3-(4,8-dimethyl-3,7-nonadienyl)-, (E)-                                                                                      | Terpenoids | -             | up           | -            | -            |
| Pinocarvone                                                                                                                        | Terpenoids | minty         | -            | up           | up           |
| beta-Element                                                                                                                       | Terpenoids | sweet         | up           | -            | -            |
| (+)-alpha-Pinene                                                                                                                   | Terpenoids | herbal        | down         | down         | -            |
| Isopinocarveol                                                                                                                     | Terpenoids | woody         | -            | up           | up           |
| d-Nerolidol                                                                                                                        | Terpenoids | floral        | down         | -            | -            |
| Benzene, 1-(1,5-dimethylhexyl)-4-methyl-                                                                                           | Terpenoids | -             | -            | -            | down         |
| (+)-3-Carene                                                                                                                       | Terpenoids | sweet         | down         | down         | -            |
| 1,3,6,10-Cyclotetradecatetraene, 3,7,11-trimethyl-14-(1-methylethyl)-, [S-(E,Z,E,E)]-                                              | Terpenoids | -             | up           | -            | -            |
| Farnesene epoxide, E-                                                                                                              | Terpenoids | -             | -            | -            | up           |
| o-Cymene                                                                                                                           | Terpenoids | -             | -            | -            | up           |
| (1S,4S,4aS)-1-Isopropyl-4,7-dimethyl-1,2,3,4,4a,5-hexahydronaphthalene                                                             | Terpenoids | -             | -            | -            | down         |
| Benzene, 1-methyl-4-(1,2,2-trimethylcyclopentyl)-, (R)-                                                                            | Terpenoids | -             | down         | -            | -            |
| Naphthalene, 1,2,3,4,4a,7-hexahydro-1,6-dimethyl-4-(1-methylethyl)-                                                                | Terpenoids | -             | down         | -            | -            |
| 1-Phenanthrenecarboxaldehyde, 1,2,3,4,4a,9,10,10a-octahydro-1,4a-dimethyl-7-(1-methylethyl)-, [1R-(1.alpha.,4a.beta.,10a.alpha.)]- | Terpenoids | -             | down         | -            | -            |
| p-Mentha-1,5,8-triene                                                                                                              | Terpenoids | roasted       | -            | down         | down         |
| (-)-Aristolene                                                                                                                     | Terpenoids | -             | -            | down         | -            |
| Bicyclo[3.1.0]hex-2-ene, 4-methylene-1-(1-methylethyl)-                                                                            | Terpenoids | -             | -            | up           | up           |

| Compounds                                                                                                           | Class        | Odour quality | Type         |              |              |
|---------------------------------------------------------------------------------------------------------------------|--------------|---------------|--------------|--------------|--------------|
|                                                                                                                     |              |               | T-GS_vs_M-GS | T-G1_vs_M-G1 | T-G2_vs_M-G2 |
| Cyclopropanecarboxylic Acid, 2,2-dimethyl-3-(2-methyl-1-propenyl)-, (1R-trans)-                                     | Terpenoids   | -             | -            | -            | up           |
| 1(2H)-Naphthalenone, 3,4,4a,5,6,7-hexahydro-4a,5-dimethyl-3-(1-methylethenyl)-, [3S-(3.alpha.,4a.alpha.,5.alpha.)]- | Terpenoids   | -             | up           | -            | -            |
| Longifolenaldehyde                                                                                                  | Terpenoids   | -             | up           | -            | -            |
| Tricyclo[2.2.1.0(2,6)]heptane-3-methanol, 2,3-dimethyl-                                                             | Terpenoids   | -             | -            | -            | up           |
| (1S,1aS,1bR,4S,5S,5aS,6aR)-1a,1b,4,5a-Tetramethyldecahydro-1,5-methanocyclopropa[a]indene                           | Terpenoids   | -             | -            | up           | up           |
| 1-Isopropyl-4,7-dimethyl-1,2,3,5,6,8a-hexahydronaphthalene                                                          | Terpenoids   | -             | down         | down         | -            |
| Bicyclo[3.2.1]oct-2-ene, 3-methyl-4-methylene-                                                                      | Terpenoids   | -             | up           | up           | up           |
| Carvenone                                                                                                           | Terpenoids   | minty         | -            | up           | -            |
| 1-(2,6,6-trimethyl-1-cyclohexen-1-yl)-1-Penten-3-one                                                                | Terpenoids   | orris         | up           | -            | -            |
| (1R,5R)-2-Methyl-5-((R)-6-methylhept-5-en-2-yl)bicyclo[3.1.0]hex-2-ene                                              | Terpenoids   | -             | -            | down         | down         |
| Adamantane                                                                                                          | Hydrocarbons | -             | down         | -            | -            |
| Nonane                                                                                                              | Hydrocarbons | gasoline      | up           | -            | up           |
| Decane                                                                                                              | Hydrocarbons | -             | -            | -            | down         |
| Pentadecane                                                                                                         | Hydrocarbons | -             | -            | -            | down         |
| Heptadecane                                                                                                         | Hydrocarbons | -             | up           | -            | -            |
| Heptane, 2,2,4,6,6-pentamethyl-                                                                                     | Hydrocarbons | -             | down         | -            | down         |
| 1,7-Nonadiene, 4,8-dimethyl-                                                                                        | Hydrocarbons | -             | up           | up           | up           |
| Nonane, 3,7-dimethyl-                                                                                               | Hydrocarbons | -             | -            | -            | down         |
| Heptane, 2,4-dimethyl-                                                                                              | Hydrocarbons | -             | -            | -            | up           |
| 4-methyl-1-(1-methylethyl)-Bicyclo[3.1.0]hex-2-ene                                                                  | Hydrocarbons | -             | down         | up           | down         |

| Compounds                                              | Class        | Odour quality | Type         |              |              |
|--------------------------------------------------------|--------------|---------------|--------------|--------------|--------------|
|                                                        |              |               | T-GS_vs_M-GS | T-G1_vs_M-G1 | T-G2_vs_M-G2 |
| 2,4-Dimethyldodecane                                   | Hydrocarbons | -             | -            | up           | -            |
| Dodecane, 4-methyl-                                    | Hydrocarbons | -             | up           | up           | -            |
| Dodecane, 4,6-dimethyl-                                | Hydrocarbons | -             | -            | -            | down         |
| Dodecane, 2,6,11-trimethyl-                            | Hydrocarbons | -             | -            | up           | -            |
| Tetradecane, 4-methyl-                                 | Hydrocarbons | -             | up           | -            | -            |
| Undecane, 2,5-dimethyl-                                | Hydrocarbons | -             | up           | up           | -            |
| Tridecane, 2-methyl-                                   | Hydrocarbons | -             | -            | -            | down         |
| Heptadecane, 2-methyl-                                 | Hydrocarbons | -             | down         | down         | -            |
| Decane, 5-methyl-                                      | Hydrocarbons | -             | -            | up           | -            |
| Undecane, 2,4-dimethyl-                                | Hydrocarbons | -             | -            | up           | up           |
| Undecane, 2-methyl-                                    | Hydrocarbons | -             | -            | up           | up           |
| 1,4,7,-Cycloundecatriene, 1,5,9,9-tetramethyl-, Z,Z,Z- | Hydrocarbons | -             | up           | up           | down         |
| 3,5-Dimethyldodecane                                   | Hydrocarbons | -             | -            | down         | up           |
| Undecane, 3,4-dimethyl-                                | Hydrocarbons | -             | -            | up           | up           |
| Undecane, 3,8-dimethyl-                                | Hydrocarbons | -             | -            | -            | down         |
| Dodecane, 5-methyl-                                    | Hydrocarbons | -             | -            | up           | -            |
| Pentadecane, 4-methyl-                                 | Hydrocarbons | -             | -            | down         | -            |
| Undecane, 4,7-dimethyl-                                | Hydrocarbons | -             | -            | -            | down         |
| Nonane, 2,6-dimethyl-                                  | Hydrocarbons | -             | -            | up           | up           |
| Nonane, 2,2,4,4,6,8,8-heptamethyl-                     | Hydrocarbons | -             | -            | down         | -            |
| 1,5-Heptadiene, 2,6-dimethyl-                          | Hydrocarbons | -             | down         | -            | -            |
| Undecane, 3,5-dimethyl-                                | Hydrocarbons | -             | -            | up           | up           |
| Octane, 2,6,6-trimethyl-                               | Hydrocarbons | -             | -            | up           | up           |
| Bicyclo(3.3.1)non-2-ene                                | Hydrocarbons | -             | -            | up           | up           |

| Compounds                                              | Class        | Odour quality               | Type         |              |              |
|--------------------------------------------------------|--------------|-----------------------------|--------------|--------------|--------------|
|                                                        |              |                             | T-GS_vs_M-GS | T-G1_vs_M-G1 | T-G2_vs_M-G2 |
| Heptane, 3,3,5-trimethyl-                              | Hydrocarbons | -                           | -            | -            | down         |
| Undecane, 4-methyl-                                    | Hydrocarbons | -                           | -            | up           | up           |
| Dodecane, 3-methyl-                                    | Hydrocarbons | -                           | -            | up           | up           |
| Nonane, 3-methyl-5-propyl-                             | Hydrocarbons | -                           | up           | -            | -            |
| 2-Methyl-7-exo-vinylbicyclo[4.2.0]oct-1(2)-ene         | Hydrocarbons | -                           | -            | down         | down         |
| 3,7-dimethyl-Undecane                                  | Hydrocarbons | -                           | -            | -            | down         |
| octyl-Cyclohexane                                      | Hydrocarbons | -                           | -            | down         | down         |
| 3-methyl-Pentadecane                                   | Hydrocarbons | -                           | -            | down         | -            |
| 2-butyl-1,3,3-trimethyl-Cyclohexene                    | Hydrocarbons | -                           | -            | down         | -            |
| Hexacosane                                             | Hydrocarbons | -                           | down         | -            | -            |
| Bicyclo[3.1.1]heptan-3-one, 2-hydroxy-2,6,6-trimethyl- | Ketone       | -                           | -            | up           | up           |
| 1,2-Cyclohexanedione                                   | Ketone       | nutty                       | -            | up           | up           |
| Cyclopentanone, 2-(2-hexenyl)-                         | Ketone       | floral                      | down         | -            | -            |
| 4-Acetylanisole                                        | Ketone       | anisic                      | up           | -            | -            |
| 2-methyl-3-Pentanone                                   | Ketone       | mint                        | down         | -            | -            |
| 5-Hepten-2-one, 6-methyl-                              | Ketone       | citrus                      | -            | down         | -            |
| (5Z)-Octa-1,5-dien-3-one                               | Ketone       | green、geranium、<br>metallic | -            | -            | down         |
| 3,5-Octadien-2-one                                     | Ketone       | fatty、fruity、<br>mushroom   | down         | down         | -            |
| 2-Pentadecanone, 6,10,14-trimethyl-                    | Ketone       | floral                      | -            | up           | -            |
| Isophorone                                             | Ketone       | woody                       | up           | -            | -            |
| 1-Pentanone, 1-(p-anisyl)-3-methyl-                    | Ketone       | -                           | -            | -            | down         |
| Ethanone, 1-(2-methyl-1-cyclopenten-1-yl)-             | Ketone       | -                           | -            | down         | down         |

| Compounds                                                               | Class                 | Odour quality             | Type         |              |              |
|-------------------------------------------------------------------------|-----------------------|---------------------------|--------------|--------------|--------------|
|                                                                         |                       |                           | T-GS_vs_M-GS | T-G1_vs_M-G1 | T-G2_vs_M-G2 |
| Cyclohexanone, 2,2,6-trimethyl-                                         | Ketone                | thujonic、honey、<br>cistus | up           | -            | -            |
| 2-Acetyl-1,3-cyclohexanedione                                           | Ketone                | -                         | -            | up           | up           |
| Ethanone, 1-(2,4-dimethylphenyl)-                                       | Ketone                | floral                    | up           | -            | -            |
| 4-Isopropyl-1,3-cyclohexanedione                                        | Ketone                | -                         | up           | up           | up           |
| 4,6-Octadiyn-3-one, 2-methyl-                                           | Ketone                | -                         | down         | down         | down         |
| 9-Cedranone                                                             | Ketone                | -                         | -            | down         | -            |
| 2-Ethoxy-3-methylpyrazine                                               | Heterocyclic compound | nutty                     | down         | -            | -            |
| 5,6,7,8-Tetrahydroquinoxaline                                           | Heterocyclic compound | nutty                     | down         | -            | -            |
| Sesquirosefuran                                                         | Heterocyclic compound | -                         | down         | -            | -            |
| Pyridine                                                                | Heterocyclic compound | fishy                     | -            | down         | -            |
| Ethanone, 1-(2-furanyl)-                                                | Heterocyclic compound | balsamic                  | down         | -            | -            |
| Furan, 2-pentyl-                                                        | Heterocyclic compound | fruity、green              | up           | -            | -            |
| Ethanone, 1-(2-pyridinyl)-                                              | Heterocyclic compound | popcorn                   | up           | -            | -            |
| Acetylpyrazine                                                          | Heterocyclic compound | popcorn                   | up           | -            | -            |
| Ethanone, 1-(1H-pyrrol-2-yl)-                                           | Heterocyclic compound | musty                     | up           | up           | up           |
| 2-Furanmethanol, 5-ethenyltetrahydro-.alpha.,.alpha.,5-trimethyl-, cis- | Heterocyclic compound | earthy、floral             | -            | up           | -            |
| rose furan epoxide                                                      | Heterocyclic compound | green                     | up           | -            | -            |
| Indole                                                                  | Heterocyclic compound | animal                    | up           | -            | -            |
| 4-Methylthiazole                                                        | Heterocyclic compound | nutty                     | -            | -            | up           |
| Coumarin                                                                | Heterocyclic compound | tonka                     | -            | -            | down         |
| 8-Azabicyclo[3.2.1]octan-3-ol, 8-methyl-, endo-                         | Heterocyclic compound | -                         | up           | up           | up           |
| 5,6-Dihydro-5-methyluracil                                              | Heterocyclic compound | -                         | up           | up           | -            |

| Compounds                                           | Class                 | Odour quality    | Type         |              |              |
|-----------------------------------------------------|-----------------------|------------------|--------------|--------------|--------------|
|                                                     |                       |                  | T-GS_vs_M-GS | T-G1_vs_M-G1 | T-G2_vs_M-G2 |
| Pentylene-tetrazol                                  | Heterocyclic compound | -                | down         | -            | -            |
| GrAmine                                             | Heterocyclic compound | -                | up           | down         | -            |
| 2,6-Dihydroxy-7-methylpurine                        | Heterocyclic compound | -                | -            | -            | up           |
| 2-methyl-4-Quinolinol                               | Heterocyclic compound | -                | up           | -            | -            |
| [1,3]Dioxolo[4,5-j]phenanthridine                   | Heterocyclic compound | -                | down         | -            | -            |
| Nifedipine                                          | Heterocyclic compound | -                | down         | -            | -            |
| 2(5H)-Furanone                                      | Heterocyclic compound | buttery          | -            | -            | up           |
| 1H-Pyrrole-3-carbonitrile                           | Heterocyclic compound | -                | up           | -            | -            |
| 1,4 Benzodioxan-6-amine                             | Heterocyclic compound | -                | -            | down         | -            |
| 2-Ethylpiperidine                                   | Heterocyclic compound | -                | -            | up           | up           |
| Piperidin-3-one, 2,2,5-methyl-                      | Heterocyclic compound | -                | up           | -            | -            |
| 2H-Pyran-2-methanol, tetrahydro-                    | Heterocyclic compound | -                | down         | -            | down         |
| 1-Pentanone, 1-(2-furanyl)-                         | Heterocyclic compound | sweet、caramellic | up           | -            | -            |
| 2H-Pyran-2-one, tetrahydro-4,6,6-trimethyl-         | Heterocyclic compound | -                | up           | up           | up           |
| 6-Quinolinamine, 2-methyl-                          | Heterocyclic compound | -                | -            | -            | up           |
| 2-Piperidinimine                                    | Heterocyclic compound | -                | -            | -            | up           |
| Furan, 2-(1-pentenyl)-, (E)-                        | Heterocyclic compound | roasted          | down         | -            | down         |
| 1,2,4,5-Tetrazin-3-Amine                            | Heterocyclic compound | -                | -            | up           | up           |
| 1,2,4,5-Tetrazine-3,6-diAmine                       | Heterocyclic compound | -                | up           | -            | -            |
| 3-Methyl-4,5-diamino-1,2,4(4H)-triazole             | Heterocyclic compound | -                | -            | up           | up           |
| 4H-Pyran-4-one, 2,3-dihydro-3,5-dihydroxy-6-methyl- | Heterocyclic compound | -                | up           | -            | up           |
| 3-Methylbenzothiophene                              | Heterocyclic compound | -                | down         | -            | -            |
| 1,7-Diazabicyclo[2.2.0]heptane                      | Heterocyclic compound | -                | up           | -            | -            |
| 2-Thiophenecarboxaldehyde, 5-chloro-                | Heterocyclic compound | -                | up           | -            | up           |

| Compounds                                             | Class                 | Odour quality            | Type         |              |              |
|-------------------------------------------------------|-----------------------|--------------------------|--------------|--------------|--------------|
|                                                       |                       |                          | T-GS_vs_M-GS | T-G1_vs_M-G1 | T-G2_vs_M-G2 |
| 2-Hydroxymethylbenzimidazole                          | Heterocyclic compound | -                        | -            | -            | down         |
| 1-Pentanone, 1-(2-thienyl)-                           | Heterocyclic compound | -                        | down         | -            | -            |
| 2,5-Furandione, 3-methyl-4-propyl-                    | Heterocyclic compound | -                        | down         | -            | -            |
| 5-Isopropyl-3,3-dimethyl-2-methylene-2,3-dihydrofuran | Heterocyclic compound | -                        | up           | -            | -            |
| 2,5-Furandione, dihydro-3-methyl-                     | Heterocyclic compound | -                        | -            | up           | up           |
| 1H-Tetrazole                                          | Heterocyclic compound | -                        | up           | up           | up           |
| 2-Furancarboxylic acid, tetrahydro-3-methyl-5-oxo-    | Heterocyclic compound | -                        | -            | up           | up           |
| 1H-Imidazole-4-methanol                               | Heterocyclic compound | -                        | down         | -            | -            |
| 8-Azabicyclo[3.2.1]octane, 3-chloro-8-methyl-         | Heterocyclic compound | -                        | -            | up           | -            |
| 2,6-Piperidinedione, 3-ethyl-                         | Heterocyclic compound | -                        | -            | up           | up           |
| N-Benzyl-2-carbomethoxyaziridine                      | Heterocyclic compound | -                        | up           | -            | -            |
| 3-FurAldehyde                                         | Heterocyclic compound | -                        | up           | up           | up           |
| (2R,4aS,5S,8aS)-2,5-Dipentyldecahydroquinoline        | Heterocyclic compound | -                        | down         | -            | -            |
| diethylboryl-.delta.-Valerolactam                     | Heterocyclic compound | -                        | up           | -            | -            |
| 2-Thiopheneacetic acid, but-3-yn-2-yl ester           | Heterocyclic compound | -                        | -            | down         | -            |
| 6-methyl-3(2H)-Pyridazinone                           | Heterocyclic compound | -                        | down         | down         | -            |
| Hexanoic acid, 3-methyl-2-butenyl ester               | Ester                 | fruity                   | -            | -            | up           |
| Propanoic acid, 2,2-dimethyl-, pentyl ester           | Ester                 | -                        | -            | up           | up           |
| Butanoic acid, 2-methyl-, 2-methylbutyl ester         | Ester                 | fruity                   | -            | -            | up           |
| n-Capric acid isobutyl ester                          | Ester                 | fermented、oily、<br>sweet | down         | -            | -            |
| 1-Hexanol, 5-methyl-2-(1-methylethyl)-, acetate       | Ester                 | -                        | -            | up           | up           |
| Butanoic acid, 3-methyl-, hexyl ester                 | Ester                 | fruity                   | -            | up           | up           |
| Acetic acid, hexyl ester                              | Ester                 | fruity                   | -            | up           | up           |

| Compounds                                                        | Class | Odour quality      | Type         |              |              |
|------------------------------------------------------------------|-------|--------------------|--------------|--------------|--------------|
|                                                                  |       |                    | T-GS_vs_M-GS | T-G1_vs_M-G1 | T-G2_vs_M-G2 |
| 3-Mercapto-3-methylbutyl formate (ester)                         | Ester | sulfurous          | up           | up           | up           |
| Butanoic acid, 3-hexenyl ester, (Z)-                             | Ester | green              | down         | down         | down         |
| cis-3-Hexenyl-.alpha.-methylbutyrate                             | Ester | green              | -            | down         | down         |
| 1,6-Octadien-3-ol, 3,7-dimethyl-, formate                        | Ester | herbal             | -            | -            | up           |
| trans-Geranic acid methyl ester                                  | Ester | waxy               | down         | -            | -            |
| Acetic acid, nonyl ester                                         | Ester | waxy               | down         | -            | -            |
| trans-3-Methyl-4-octanolide                                      | Ester | coconut            | -            | up           | -            |
| Hexanoic acid, 3-hexenyl ester, (Z)-                             | Ester | green              | -            | -            | down         |
| Hexanoic acid, hexyl ester                                       | Ester | green              | -            | -            | down         |
| Butanoic acid, 3-methyl-, 1-ethenyl-1,5-dimethyl-4-hexenyl ester | Ester | herbal、cirtus      | up           | -            | -            |
| Butanoic acid, 3,7-dimethyl-2,6-octadienyl ester, (E)-           | Ester | fruity             | -            | -            | down         |
| Benzoic acid, 1-methylethyl ester                                | Ester | floral             | up           | -            | -            |
| Hexanedioic acid, dimethyl ester                                 | Ester | nutty              | -            | -            | up           |
| 2-Ethylhexyl acrylate                                            | Ester | -                  | -            | up           | up           |
| Fenobucarb                                                       | Ester | -                  | up           | -            | -            |
| n-Caproic acid vinyl ester                                       | Ester | -                  | -            | -            | up           |
| 2-Oxepanone                                                      | Ester | -                  | -            | up           | up           |
| E-2-Hexenyl benzoate                                             | Ester | -                  | down         | -            | -            |
| Butanoic Acid, 3-methylbutyl ester                               | Ester | fruity             | -            | up           | up           |
| Methylparaben                                                    | Ester | -                  | -            | down         | -            |
| 4-Decenoic acid, methyl ester, Z-                                | Ester | fruity、fishy、green | down         | -            | -            |
| 9,12,15-Octadecatrienoic acid, methyl ester                      | Ester | oily、fatty、fruity  | down         | -            | -            |
| Fenchyl acetate                                                  | Ester | balsamic           | up           | up           | up           |
| Isopropyl myristate                                              | Ester | fatty              | up           | up           | up           |

| Compounds                                                           | Class | Odour quality     | Type         |              |              |
|---------------------------------------------------------------------|-------|-------------------|--------------|--------------|--------------|
|                                                                     |       |                   | T-GS_vs_M-GS | T-G1_vs_M-G1 | T-G2_vs_M-G2 |
| n-Propyl acetate                                                    | Ester | fruity            | -            | -            | down         |
| 3-Hexen-1-ol benzoate                                               | Ester | -                 | -            | -            | down         |
| 9,12,15-Octadecatrienoic acid, methyl ester, (Z,Z,Z)-               | Ester | -                 | -            | up           | -            |
| Sulfurous acid, isobutyl pentyl ester                               | Ester | -                 | -            | up           | -            |
| Benzoic acid, 2-propenyl ester                                      | Ester | fruity            | up           | -            | -            |
| l-Alanine, N-(2,3,4-trifluorobenzoyl)-, methyl ester                | Ester | -                 | -            | -            | down         |
| 4-Hexen-1-ol, 5-methyl-2-(1-methylethenyl)-, acetate                | Ester | -                 | -            | up           | up           |
| (E)-Hex-3-enyl (E)-2-methylbut-2-enoate                             | Ester | -                 | -            | down         | -            |
| 4-Methylhexyl 3-methylbutanoate                                     | Ester | -                 | down         | -            | -            |
| Butanoic acid, cyclopentyl ester                                    | Ester | -                 | down         | -            | -            |
| Butanoic acid, 1-methylhexyl ester                                  | Ester | fruity            | -            | up           | up           |
| Ethyl mandelate                                                     | Ester | -                 | up           | -            | -            |
| Propanoic acid, 2-methyl-, butyl ester                              | Ester | fruity            | up           | -            | -            |
| Propanoic acid, 2-methyl-, 2-methylbutyl ester                      | Ester | fruity            | -            | up           | up           |
| Acetic acid, (propylthio)-, methyl ester                            | Ester | -                 | up           | -            | -            |
| Hexanoic acid, 2-methylbutyl ester                                  | Ester | ethereal          | -            | up           | up           |
| Hexanoic acid, pentyl ester                                         | Ester | fruity            | -            | up           | up           |
| Propanoic acid, 2-methyl-, propyl ester                             | Ester | fruity            | -            | -            | up           |
| 1-Octyl trifluoroacetate                                            | Ester | -                 | -            | up           | up           |
| Benzoic acid, 3,4-dimethyl-, methyl ester                           | Ester | -                 | up           | -            | up           |
| Octanoic acid, 3-hexenyl ester, (Z)-                                | Ester | green             | -            | -            | down         |
| Pentadecanoic acid, 14-methyl-, methyl ester                        | Ester | -                 | down         | -            | -            |
| (6,6-dimethyl-2-bicyclo[3.1.1]hept-2-enyl)methyl 2-methylpropanoate | Ester | woody、fruity、pine | -            | down         | -            |

| Compounds                                        | Class | Odour quality | Type         |              |              |
|--------------------------------------------------|-------|---------------|--------------|--------------|--------------|
|                                                  |       |               | T-GS_vs_M-GS | T-G1_vs_M-G1 | T-G2_vs_M-G2 |
| Valeric acid, 4-nitrophenyl ester                | Ester | -             | up           | -            | -            |
| Sulfurous acid, hexyl pentadecyl ester           | Ester | -             | -            | -            | down         |
| Sulfurous acid, 2-ethylhexyl hexyl ester         | Ester | -             | -            | -            | down         |
| Pentadecafluorooctanoic acid, 2-ethylhexyl ester | Ester | -             | -            | -            | down         |
| 2-(2-butoxyethoxy)-Ethanol,acetate               | Ester | -             | -            | down         | -            |
| (Z,Z)-9,15-Octadecadienoic acid, methyl ester    | Ester | -             | up           | -            | -            |
| (E)-Hexanoic acid, 2-hexenyl ester               | Ester | green         | -            | -            | down         |

Table S4. The 53 volatile components with higher content in M-GS.

| No. | Compounds                                                                                                               | Class                    | Odour quality              |
|-----|-------------------------------------------------------------------------------------------------------------------------|--------------------------|----------------------------|
| 1   | CyclohexanAmine, N-cyclohexyl-                                                                                          | Amine                    | -                          |
| 2   | 3,7-Octadiene-2,6-diol, 2,6-dimethyl-                                                                                   | Alcohol                  | -                          |
| 3   | Cyclobutaneethanol, 1-methyl-2-(1-methylethenyl)-, cis-                                                                 | Alcohol                  | -                          |
| 4   | 4-Hexen-1-ol, acetate                                                                                                   | Alcohol                  | -                          |
| 5   | 3,6-Nonadien-1-ol, (E,Z)-                                                                                               | Alcohol                  | green                      |
| 6   | 3-Hexen-1-ol, (Z)-                                                                                                      | Alcohol                  | green                      |
| 7   | (5-bromopentyl)-Benzene,                                                                                                | Aromatics                | -                          |
| 8   | Benzene, (2-nitroethyl)-                                                                                                | Aromatics                | flower、spice               |
| 9   | Naphthalene, 1,2,3,4,4a,5,6,7-octahydro-4a-methyl-                                                                      | Aromatics                | -                          |
| 10  | Benzene, 1,4-dichloro-                                                                                                  | Aromatics                | -                          |
| 11  | Benzene, 2-ethyl-1,4-dimethyl-                                                                                          | Aromatics                | -                          |
| 12  | p-Xylene                                                                                                                | Aromatics                | plastic, green,<br>pungent |
| 13  | Phenol, 4-propyl-                                                                                                       | Phenol                   | phenolic、<br>medicinal     |
| 14  | 1-iodo-Decane                                                                                                           | Halogenated hydrocarbons | -                          |
| 15  | BenzAldehyde, 2-methyl-                                                                                                 | Aldehyde                 | cherry                     |
| 16  | BenzeneacetAldehyde                                                                                                     | Aldehyde                 | green                      |
| 17  | 2-Octenoic Acid                                                                                                         | Acid                     | -                          |
| 18  | 1,3,6,10-Cyclotetradecatetraene, 3,7,11-trimethyl-14-(1-methylethyl)-, [S-(E,Z,E,E)]-(1aR,1bS,2aS,5S,5aS,7aS)-2,2,5,7a- | Terpenoids               | -                          |
| 19  | Tetramethyldecahydrocyclopenta[2',3']cyclobuta[1',2':3,4]benzo[1,2-b]oxirene                                            | Terpenoids               | -                          |
| 20  | Longifolenaldehyde                                                                                                      | Terpenoids               | -                          |
| 21  | Furan, 3-(4,8-dimethyl-3,7-nonadienyl)-, (E)-                                                                           | Terpenoids               | -                          |
| 22  | 1(2H)-Naphthalenone, 3,4,4a,5,6,7-hexahydro-4a,5-dimethyl-3-(1-methylethenyl)-, [3S-(3.alpha.,4a.alpha.,5.alpha.)]-     | Terpenoids               | -                          |
| 23  | beta-Element                                                                                                            | Terpenoids               | sweet                      |
| 24  | 2-Cyclohexen-1-one, 2-hydroxy-3-methyl-6-(1-methylethyl)-                                                               | Terpenoids               | minty                      |
| 25  | 2,6-Octadienal, 3,7-dimethyl-, (Z)-                                                                                     | Terpenoids               | citrus                     |
| 26  | (E)-4,8-Dimethylnona-1,3,7-triene                                                                                       | Terpenoids               | -                          |
| 27  | safranal                                                                                                                | Terpenoids               | herbal                     |
| 28  | Nonane, 3-methyl-5-propyl-                                                                                              | Hydrocarbons             | -                          |
| 29  | Nonane                                                                                                                  | Hydrocarbons             | gasoline                   |
| 30  | 4-Acetylanisole                                                                                                         | Ketone                   | anisic                     |
| 31  | Ethanone, 1-(2,4-dimethylphenyl)-                                                                                       | Ketone                   | floral                     |
| 32  | Cyclohexanone, 2,2,6-trimethyl-                                                                                         | Ketone                   | thujonic、<br>pungent       |
| 33  | Isophorone                                                                                                              | Ketone                   | woody                      |
| 34  | diethylboryl-.delta.-Valerolactam                                                                                       | Heterocyclic compound    | -                          |
| 35  | N-Benzyloxy-2-carbomethoxyaziridine                                                                                     | Heterocyclic compound    | -                          |

| No. | Compounds                                                           | Class                 | Odour quality           |
|-----|---------------------------------------------------------------------|-----------------------|-------------------------|
| 36  | GrAmine                                                             | Heterocyclic compound | -                       |
| 37  | rose furan epoxide                                                  | Heterocyclic compound | green                   |
| 38  | 2-methyl-4-Quinolinol                                               | Heterocyclic compound | -                       |
| 39  | 5-Isopropyl-3,3-dimethyl-2-methylene-2,3-dihydrofuran               | Heterocyclic compound | -                       |
| 40  | 1-Pentanone, 1-(2-furanyl)-                                         | Heterocyclic compound | sweet、<br>caramellic    |
| 41  | Piperidin-3-one, 2,2,5-methyl-                                      | Heterocyclic compound | -                       |
| 42  | Furan, 2-pentyl-                                                    | Heterocyclic compound | fruity、<br>green、earthy |
| 43  | 5,6-Dihydro-5-methyluracil                                          | Heterocyclic compound | -                       |
| 44  | 1,2,4,5-Tetrazine-3,6-diAmine                                       | Heterocyclic compound | -                       |
| 45  | 1,7-Diazabicyclo[2.2.0]heptane                                      | Heterocyclic compound | -                       |
| 46  | 1H-Pyrrole-3-carbonitrile                                           | Heterocyclic compound | -                       |
| 47  | Fenobucarb                                                          | Ester                 | -                       |
| 48  | Butanoic acid, 3-methyl-, 1-ethenyl-1,5-dimethyl-4-hexenyl<br>ester | Ester                 | herbal                  |
| 49  | Ethyl mandelate                                                     | Ester                 | -                       |
| 50  | Benzoic acid, 3,4-dimethyl-, methyl ester                           | Ester                 | -                       |
| 51  | Benzoic acid, 1-methylethyl ester                                   | Ester                 | floral                  |
| 52  | Benzoic acid, 2-propenyl ester                                      | Ester                 | fruity                  |
| 53  | Propanoic acid, 2-methyl-, butyl ester                              | Ester                 | fruity                  |
